# Supplementary material for: Intrinsic group behaviour: Dependence of pedestrian dyad dynamics on principal social and personal features
Source: PubMed Central journal article supplement (PMC5667819; doi:10.1371/journal.pone.0187253), 2017-11-02
Supplement: pone.0187253.s011.pdf [file pone.0187253.s011.pdf]

# Statistical analysis of overall probability distributions

## Purpose

Table 1 provides a statistical analysis of the overall probability distributions for the purpose categories.

Table 1: Statistical analysis of the overall probability distributions for the purpose categories. Lengths in millimetres, times in seconds.

| Purpose       | $N^k$ | $V$                             | $r$                            | $x$                            | $y$                            |
|---------------|-------|---------------------------------|--------------------------------|--------------------------------|--------------------------------|
| Leisure       | 38501 | $1096 \pm 1.3$ ( $\sigma=251$ ) | $799 \pm 1.6$ ( $\sigma=309$ ) | $630 \pm 1.2$ ( $\sigma=236$ ) | $360 \pm 2$ ( $\sigma=388$ )   |
| Work          | 18936 | $1257 \pm 1.7$ ( $\sigma=235$ ) | $834 \pm 2.1$ ( $\sigma=287$ ) | $714 \pm 1.6$ ( $\sigma=227$ ) | $315 \pm 2.5$ ( $\sigma=341$ ) |
| $F_{1,57435}$ |       | 5400                            | 169                            | 1640                           | 184                            |
| $p$           |       | $< 10^{-8}$                     | $< 10^{-8}$                    | $< 10^{-8}$                    | $< 10^{-8}$                    |
| $R^2$         |       | 0.0859                          | 0.00293                        | 0.0278                         | 0.00319                        |
| $\delta$      |       | 0.652                           | 0.115                          | 0.36                           | 0.12                           |

## Relation

Table 2 provides a statistical analysis of the overall probability distributions for the relation categories.

Table 2: Statistical analysis of the overall probability distributions for the relation categories. Lengths in millimetres, times in seconds.

| Relation      | $N^k$ | $V$                             | $r$                            | $x$                            | $y$                            |
|---------------|-------|---------------------------------|--------------------------------|--------------------------------|--------------------------------|
| Colleagues    | 18172 | $1262 \pm 1.7$ ( $\sigma=234$ ) | $840 \pm 2.2$ ( $\sigma=290$ ) | $720 \pm 1.7$ ( $\sigma=229$ ) | $317 \pm 2.6$ ( $\sigma=344$ ) |
| Couples       | 5273  | $1085 \pm 3.2$ ( $\sigma=231$ ) | $699 \pm 3.7$ ( $\sigma=271$ ) | $584 \pm 2.6$ ( $\sigma=188$ ) | $290 \pm 4.4$ ( $\sigma=318$ ) |
| Families      | 12596 | $1072 \pm 2.2$ ( $\sigma=246$ ) | $834 \pm 3.2$ ( $\sigma=357$ ) | $592 \pm 2.3$ ( $\sigma=260$ ) | $452 \pm 4$ ( $\sigma=447$ )   |
| Friends       | 17634 | $1113 \pm 2$ ( $\sigma=260$ )   | $788 \pm 2$ ( $\sigma=265$ )   | $659 \pm 1.6$ ( $\sigma=214$ ) | $312 \pm 2.5$ ( $\sigma=338$ ) |
| $F_{3,53671}$ |       | 1940                            | 362                            | 975                            | 485                            |
| $p$           |       | $< 10^{-8}$                     | $< 10^{-8}$                    | $< 10^{-8}$                    | $< 10^{-8}$                    |
| $R^2$         |       | 0.0978                          | 0.0198                         | 0.0517                         | 0.0264                         |
| $\delta$      |       | 0.795                           | 0.493                          | 0.614                          | 0.392                          |

## Gender

Table 3 provides a statistical analysis of the overall probability distributions for the relation categories.

## Age

Table 4 provides a statistical analysis of the overall probability distributions for the minimum age ranges.

Table 3: Statistical analysis of the overall probability distributions for the gender categories. Lengths in millimetres, times in seconds.

| Gender        | $N^k$ | $V$                             | $r$                            | $x$                            | $y$                            |
|---------------|-------|---------------------------------|--------------------------------|--------------------------------|--------------------------------|
| Two females   | 14688 | $1075 \pm 2.1$ ( $\sigma=251$ ) | $773 \pm 2.2$ ( $\sigma=268$ ) | $647 \pm 1.7$ ( $\sigma=202$ ) | $302 \pm 2.9$ ( $\sigma=346$ ) |
| Mixed         | 19311 | $1098 \pm 1.7$ ( $\sigma=239$ ) | $803 \pm 2.4$ ( $\sigma=334$ ) | $614 \pm 1.8$ ( $\sigma=248$ ) | $388 \pm 3$ ( $\sigma=411$ )   |
| Two males     | 23516 | $1237 \pm 1.6$ ( $\sigma=249$ ) | $839 \pm 1.9$ ( $\sigma=292$ ) | $702 \pm 1.6$ ( $\sigma=239$ ) | $337 \pm 2.3$ ( $\sigma=355$ ) |
| $F_{2,57512}$ |       | 2570                            | 225                            | 791                            | 232                            |
| $p$           |       | $< 10^{-8}$                     | $< 10^{-8}$                    | $< 10^{-8}$                    | $< 10^{-8}$                    |
| $R^2$         |       | 0.0822                          | 0.00778                        | 0.0268                         | 0.008                          |
| $\delta$      |       | 0.647                           | 0.233                          | 0.365                          | 0.224                          |

Table 4: Statistical analysis of the overall probability distributions for the minimum age ranges. Lengths in millimetres, times in seconds.

| Minimum age     | $N^k$ | $V$                             | $r$                            | $x$                            | $y$                            |
|-----------------|-------|---------------------------------|--------------------------------|--------------------------------|--------------------------------|
| 0-9 years       | 1041  | $1127 \pm 8.4$ ( $\sigma=272$ ) | $983 \pm 15$ ( $\sigma=480$ )  | $573 \pm 9.5$ ( $\sigma=306$ ) | $663 \pm 18$ ( $\sigma=580$ )  |
| 10-19 years     | 3443  | $1110 \pm 5.2$ ( $\sigma=303$ ) | $767 \pm 5.1$ ( $\sigma=298$ ) | $626 \pm 3.8$ ( $\sigma=222$ ) | $322 \pm 6.2$ ( $\sigma=364$ ) |
| 20-29 years     | 18679 | $1167 \pm 1.8$ ( $\sigma=240$ ) | $788 \pm 2.1$ ( $\sigma=289$ ) | $665 \pm 1.6$ ( $\sigma=223$ ) | $301 \pm 2.6$ ( $\sigma=349$ ) |
| 30-39 years     | 15552 | $1179 \pm 2.1$ ( $\sigma=264$ ) | $816 \pm 2.4$ ( $\sigma=294$ ) | $667 \pm 2$ ( $\sigma=248$ )   | $343 \pm 2.9$ ( $\sigma=357$ ) |
| 40-49 years     | 7974  | $1167 \pm 2.7$ ( $\sigma=242$ ) | $838 \pm 3.3$ ( $\sigma=296$ ) | $668 \pm 2.7$ ( $\sigma=243$ ) | $374 \pm 4.2$ ( $\sigma=378$ ) |
| 50-59 years     | 6025  | $1153 \pm 3.3$ ( $\sigma=253$ ) | $812 \pm 3.7$ ( $\sigma=284$ ) | $653 \pm 2.9$ ( $\sigma=223$ ) | $358 \pm 4.7$ ( $\sigma=367$ ) |
| 60-69 years     | 3969  | $1001 \pm 3.5$ ( $\sigma=219$ ) | $836 \pm 5.4$ ( $\sigma=340$ ) | $643 \pm 3.8$ ( $\sigma=242$ ) | $409 \pm 6.7$ ( $\sigma=419$ ) |
| $\geq 70$ years | 832   | $877 \pm 6$ ( $\sigma=172$ )    | $793 \pm 13$ ( $\sigma=363$ )  | $599 \pm 7.8$ ( $\sigma=224$ ) | $383 \pm 16$ ( $\sigma=453$ )  |
| $F_{7,57507}$   |       | 400                             | 89.1                           | 46.7                           | 175                            |
| $p$             |       | $< 10^{-8}$                     | $< 10^{-8}$                    | $< 10^{-8}$                    | $< 10^{-8}$                    |
| $R^2$           |       | 0.0464                          | 0.0107                         | 0.00566                        | 0.0208                         |
| $\delta$        |       | 1.16                            | 0.619                          | 0.382                          | 0.991                          |

## Height

Table 5 provides a statistical analysis of the overall probability distributions for the minimum height ranges.

Table 5: Statistical analysis of the overall probability distributions for the minimum height ranges. Lengths in millimetres, times in seconds.

| Minimum height | $N^k$ | $V$                             | $r$                            | $x$                            | $y$                            |
|----------------|-------|---------------------------------|--------------------------------|--------------------------------|--------------------------------|
| $< 140$ cm     | 1579  | $1127 \pm 6.9$ ( $\sigma=274$ ) | $942 \pm 11$ ( $\sigma=457$ )  | $605 \pm 7.6$ ( $\sigma=300$ ) | $578 \pm 14$ ( $\sigma=553$ )  |
| 140-150 cm     | 2206  | $1032 \pm 6.7$ ( $\sigma=315$ ) | $855 \pm 8$ ( $\sigma=374$ )   | $644 \pm 5.3$ ( $\sigma=248$ ) | $420 \pm 10$ ( $\sigma=468$ )  |
| 150-160 cm     | 13064 | $1076 \pm 2.2$ ( $\sigma=251$ ) | $779 \pm 2.5$ ( $\sigma=281$ ) | $628 \pm 1.8$ ( $\sigma=209$ ) | $337 \pm 3.2$ ( $\sigma=365$ ) |
| 160-170 cm     | 26345 | $1151 \pm 1.5$ ( $\sigma=245$ ) | $810 \pm 1.9$ ( $\sigma=306$ ) | $655 \pm 1.5$ ( $\sigma=243$ ) | $348 \pm 2.3$ ( $\sigma=374$ ) |
| 170-180 cm     | 13497 | $1234 \pm 2.1$ ( $\sigma=243$ ) | $819 \pm 2.3$ ( $\sigma=269$ ) | $700 \pm 2$ ( $\sigma=232$ )   | $309 \pm 2.8$ ( $\sigma=323$ ) |
| $> 180$ cm     | 824   | $1224 \pm 9.3$ ( $\sigma=268$ ) | $823 \pm 11$ ( $\sigma=325$ )  | $686 \pm 8.1$ ( $\sigma=234$ ) | $309 \pm 14$ ( $\sigma=404$ )  |
| $F_{5,57509}$  |       | 648                             | 102                            | 149                            | 171                            |
| $p$            |       | $< 10^{-8}$                     | $< 10^{-8}$                    | $< 10^{-8}$                    | $< 10^{-8}$                    |
| $R^2$          |       | 0.0533                          | 0.00875                        | 0.0128                         | 0.0146                         |
| $\delta$       |       | 0.796                           | 0.534                          | 0.398                          | 0.532                          |
