# Supplementary material for: Intrinsic group behaviour: Dependence of pedestrian dyad dynamics on principal social and personal features
Source: PubMed Central journal article supplement (PMC5667819; doi:10.1371/journal.pone.0187253), 2017-11-02
Supplement: pone.0187253.s012.pdf [file pone.0187253.s012.pdf]

# Accounting for other effects

## Secondary effects and purpose

### Density

Work-oriented dyads are more frequently found during working days, in which the environment presents a lower density (and thus higher velocity and inter-group pedestrian distance<sup>1</sup>). It is thus important to analyse the results regarding purpose in the main text when they are divided for density ranges, for example by comparing results in the  $0 \leq \rho < 0.05$  pedestrian per square meter range with those in the  $0.15 \leq \rho < 0.2$  range<sup>2</sup>. The results are reported in table 1 and 2, showing that the differences in  $V$  and  $x$  remain significant regardless of density. The difference in  $y$  becomes significant at high density, while at very low density is not significant. The opposite happens for  $r$ .

Table 1: Observable dependence on purpose for dyads in the  $0 \leq \rho \leq 0.05$  pedestrian per square meter density range. Lengths in millimetres, times in seconds.

| Purpose     | $N_g^k$ | $V$                            | $r$                           | $x$                           | $y$                           |
|-------------|---------|--------------------------------|-------------------------------|-------------------------------|-------------------------------|
| Leisure     | 426     | $1113 \pm 10$ ( $\sigma=215$ ) | $851 \pm 15$ ( $\sigma=303$ ) | $658 \pm 9$ ( $\sigma=186$ )  | $400 \pm 18$ ( $\sigma=373$ ) |
| Work        | 209     | $1274 \pm 12$ ( $\sigma=169$ ) | $924 \pm 20$ ( $\sigma=296$ ) | $741 \pm 14$ ( $\sigma=203$ ) | $409 \pm 26$ ( $\sigma=373$ ) |
| $F_{1,633}$ |         | 89.6                           | 8.17                          | 25.7                          | 0.0807                        |
| $p$         |         | $< 10^{-8}$                    | 0.0044                        | $5.36 \cdot 10^{-7}$          | 0.776                         |
| $R^2$       |         | 0.124                          | 0.0127                        | 0.039                         | 0.000128                      |
| $\delta$    |         | 0.8                            | 0.242                         | 0.428                         | 0.024                         |

Table 2: Observable dependence on purpose for dyads in the  $0.15 \leq \rho \leq 0.2$  pedestrian per square meter density range. Lengths in millimetres, times in seconds.

| Purpose     | $N_g^k$ | $V$                            | $r$                           | $x$                           | $y$                           |
|-------------|---------|--------------------------------|-------------------------------|-------------------------------|-------------------------------|
| Leisure     | 145     | $1084 \pm 14$ ( $\sigma=170$ ) | $764 \pm 17$ ( $\sigma=209$ ) | $560 \pm 13$ ( $\sigma=158$ ) | $390 \pm 26$ ( $\sigma=308$ ) |
| Work        | 22      | $1229 \pm 27$ ( $\sigma=125$ ) | $754 \pm 26$ ( $\sigma=123$ ) | $673 \pm 25$ ( $\sigma=117$ ) | $237 \pm 40$ ( $\sigma=186$ ) |
| $F_{1,165}$ |         | 14.7                           | 0.0513                        | 10.2                          | 5.05                          |
| $p$         |         | 0.000182                       | 0.821                         | 0.00167                       | 0.026                         |
| $R^2$       |         | 0.0817                         | 0.000311                      | 0.0583                        | 0.0297                        |
| $\delta$    |         | 0.881                          | 0.0521                        | 0.735                         | 0.516                         |

In table 3 and 4 we report, respectively,  $p$  and  $\delta$  values for purpose corresponding to each observable and density range, showing that the  $V$ ,  $x$  and  $y$  distributions are different in a statistically significant way at different density ranges, although the effect on  $y$  grows with density. Differences in  $r$  are significant only at the lowest density range.

<sup>1</sup>F. Zanlungo, D. Bršćić and T. Kanda, *Spatial-size scaling of pedestrian groups under growing density conditions* Physical Review E 91 (6), 062810 (2015), citation [2] in the main text.

<sup>2</sup>Groups may contribute to different density ranges, see again citation [2] in the main text for details.

Table 3:  $p$  values for purpose corresponding to velocity and distance observables at different density ranges.

| Density                     | $V$         | $r$    | $x$                  | $y$                  |
|-----------------------------|-------------|--------|----------------------|----------------------|
| 0-0.05 ped/m <sup>2</sup>   | $< 10^{-8}$ | 0.0044 | $5.36 \cdot 10^{-7}$ | 0.776                |
| 0.05-0.1 ped/m <sup>2</sup> | $< 10^{-8}$ | 0.682  | $< 10^{-8}$          | 0.000517             |
| 0.1-0.15 ped/m <sup>2</sup> | $< 10^{-8}$ | 0.221  | $< 10^{-8}$          | $1.32 \cdot 10^{-6}$ |
| 0.15-0.2 ped/m <sup>2</sup> | 0.000182    | 0.821  | 0.00167              | 0.026                |

Table 4:  $\delta$  values for purpose corresponding to velocity and distance observables at different density ranges.

| Density                     | $V$   | $r$    | $x$   | $y$   |
|-----------------------------|-------|--------|-------|-------|
| 0-0.05 ped/m <sup>2</sup>   | 0.8   | 0.242  | 0.428 | 0.024 |
| 0.05-0.1 ped/m <sup>2</sup> | 0.914 | 0.0292 | 0.515 | 0.248 |
| 0.1-0.15 ped/m <sup>2</sup> | 0.812 | 0.117  | 0.627 | 0.467 |
| 0.15-0.2 ped/m <sup>2</sup> | 0.881 | 0.0521 | 0.735 | 0.516 |

## Gender

The work and leisure populations are strongly biased regarding gender. In tables 5, 6 and 7 we show the results for the work and leisure observables when limited to, respectively, female, mixed and male dyads. While velocity is still significantly different also when gender is fixed, absolute distance in men, group depth in mixed dyads, and all distance observables in females are not significantly different. We may thus conclude that differences between workers and leisure oriented people are present regardless of gender, but are magnified by the gender difference in the two populations.

Table 5: Observable dependence on purpose for 2 female dyads. Lengths in millimetres, times in seconds.

| Purpose     | $N_g^k$ | $V$                            | $r$                           | $x$                            | $y$                           |
|-------------|---------|--------------------------------|-------------------------------|--------------------------------|-------------------------------|
| Leisure     | 222     | $1092 \pm 13$ ( $\sigma=194$ ) | $794 \pm 16$ ( $\sigma=235$ ) | $644 \pm 8.4$ ( $\sigma=125$ ) | $328 \pm 22$ ( $\sigma=322$ ) |
| Work        | 29      | $1184 \pm 30$ ( $\sigma=162$ ) | $755 \pm 28$ ( $\sigma=150$ ) | $663 \pm 19$ ( $\sigma=101$ )  | $274 \pm 38$ ( $\sigma=204$ ) |
| $F_{1,249}$ |         | 5.97                           | 0.733                         | 0.615                          | 0.777                         |
| $p$         |         | 0.0153                         | 0.393                         | 0.433                          | 0.379                         |
| $R^2$       |         | 0.0234                         | 0.00293                       | 0.00247                        | 0.00311                       |
| $\delta$    |         | 0.484                          | 0.17                          | 0.155                          | 0.175                         |

## Age

In tables (8) and (9) we show the results for the work and leisure observables when limited to groups of a given average age. The results suggest that differences may be

Table 6: Observable dependence on purpose for mixed gender dyads. Lengths in millimetres, times in seconds.

| Purpose     | $N_g^k$ | $V$                             | $r$                           | $x$                            | $y$                           |
|-------------|---------|---------------------------------|-------------------------------|--------------------------------|-------------------------------|
| Leisure     | 330     | 1097 $\pm$ 9.9 ( $\sigma=180$ ) | 814 $\pm$ 15 ( $\sigma=267$ ) | 602 $\pm$ 9.6 ( $\sigma=174$ ) | 415 $\pm$ 19 ( $\sigma=341$ ) |
| Work        | 41      | 1226 $\pm$ 26 ( $\sigma=167$ )  | 902 $\pm$ 48 ( $\sigma=308$ ) | 698 $\pm$ 24 ( $\sigma=152$ )  | 420 $\pm$ 65 ( $\sigma=419$ ) |
| $F_{1,369}$ |         | 18.9                            | 3.79                          | 11.3                           | 0.00662                       |
| $p$         |         | $1.77 \cdot 10^{-5}$            | 0.0524                        | 0.000849                       | 0.935                         |
| $R^2$       |         | 0.0488                          | 0.0102                        | 0.0298                         | $1.79 \cdot 10^{-5}$          |
| $\delta$    |         | 0.722                           | 0.323                         | 0.558                          | 0.0135                        |

Table 7: Observable dependence on purpose for 2 male dyads. Lengths in millimetres, times in seconds.

| Purpose     | $N_g^k$ | $V$                             | $r$                           | $x$                           | $y$                           |
|-------------|---------|---------------------------------|-------------------------------|-------------------------------|-------------------------------|
| Leisure     | 164     | 1196 $\pm$ 16 ( $\sigma=207$ )  | 846 $\pm$ 19 ( $\sigma=246$ ) | 660 $\pm$ 14 ( $\sigma=173$ ) | 392 $\pm$ 25 ( $\sigma=325$ ) |
| Work        | 302     | 1285 $\pm$ 8.7 ( $\sigma=152$ ) | 846 $\pm$ 13 ( $\sigma=218$ ) | 720 $\pm$ 9 ( $\sigma=157$ )  | 325 $\pm$ 16 ( $\sigma=271$ ) |
| $F_{1,464}$ |         | 28.1                            | 0.000251                      | 14.4                          | 5.5                           |
| $p$         |         | $1.83 \cdot 10^{-7}$            | 0.987                         | 0.000165                      | 0.0195                        |
| $R^2$       |         | 0.057                           | $5.42 \cdot 10^{-7}$          | 0.0301                        | 0.0117                        |
| $\delta$    |         | 0.515                           | 0.00154                       | 0.369                         | 0.228                         |

present at any age (in particular concerning  $V$ ), but are definitely more strong for more mature walkers.

Table 8: Observable dependence on purpose for dyads with average age in the 20-29 years range. Lengths in millimetres, times in seconds.

| Purpose     | $N_g^k$ | $V$                            | $r$                           | $x$                            | $y$                           |
|-------------|---------|--------------------------------|-------------------------------|--------------------------------|-------------------------------|
| Leisure     | 292     | 1164 $\pm$ 10 ( $\sigma=177$ ) | 798 $\pm$ 14 ( $\sigma=242$ ) | 656 $\pm$ 9.7 ( $\sigma=165$ ) | 326 $\pm$ 17 ( $\sigma=290$ ) |
| Work        | 78      | 1242 $\pm$ 19 ( $\sigma=166$ ) | 775 $\pm$ 17 ( $\sigma=152$ ) | 684 $\pm$ 12 ( $\sigma=108$ )  | 266 $\pm$ 22 ( $\sigma=197$ ) |
| $F_{1,368}$ |         | 12.2                           | 0.608                         | 1.91                           | 2.93                          |
| $p$         |         | 0.000536                       | 0.436                         | 0.168                          | 0.088                         |
| $R^2$       |         | 0.0321                         | 0.00165                       | 0.00515                        | 0.00789                       |
| $\delta$    |         | 0.446                          | 0.0996                        | 0.176                          | 0.219                         |

In table 10 and 11 we report, respectively,  $p$  and  $\delta$  values for purpose corresponding to each observable and average age range, showing again that differences have a tendency to be more pronounced in the high age ranges.

## Height

In tables (12) and (13) we show the results for the work and leisure observables when limited to groups of a given average height, and in tables 14 and 15 we report, respectively,  $p$  and  $\delta$  values for purpose corresponding to each observable and average height

Table 9: Observable dependence on purpose for dyads with average age in the 50-59 years range. Lengths in millimetres, times in seconds.

| Purpose     | $N_g^k$ | $V$                            | $r$                           | $x$                           | $y$                           |
|-------------|---------|--------------------------------|-------------------------------|-------------------------------|-------------------------------|
| Leisure     | 61      | $1053 \pm 21$ ( $\sigma=164$ ) | $808 \pm 32$ ( $\sigma=247$ ) | $601 \pm 20$ ( $\sigma=155$ ) | $404 \pm 46$ ( $\sigma=356$ ) |
| Work        | 53      | $1276 \pm 21$ ( $\sigma=153$ ) | $845 \pm 24$ ( $\sigma=173$ ) | $706 \pm 20$ ( $\sigma=144$ ) | $345 \pm 36$ ( $\sigma=261$ ) |
| $F_{1,112}$ |         | 54.8                           | 0.808                         | 13.7                          | 0.966                         |
| $p$         |         | $< 10^{-8}$                    | 0.371                         | 0.000328                      | 0.328                         |
| $R^2$       |         | 0.329                          | 0.00716                       | 0.109                         | 0.00855                       |
| $\delta$    |         | 1.4                            | 0.17                          | 0.702                         | 0.186                         |

Table 10:  $p$  values for purpose corresponding to velocity and distance observables at different average age ranges.

| Average age | $V$         | $r$    | $x$                  | $y$   |
|-------------|-------------|--------|----------------------|-------|
| 20-29 years | 0.000536    | 0.436  | 0.168                | 0.088 |
| 30-39 years | $< 10^{-8}$ | 0.0689 | $6.34 \cdot 10^{-8}$ | 0.144 |
| 40-49 years | $< 10^{-8}$ | 0.12   | $4.78 \cdot 10^{-6}$ | 0.264 |
| 50-59 years | $< 10^{-8}$ | 0.371  | 0.000328             | 0.328 |
| 60-69 years | 0.0233      | 0.221  | 0.48                 | 0.463 |

Table 11:  $\delta$  values for purpose corresponding to velocity and distance observables at different average age ranges.

| Average age | $V$   | $r$    | $x$   | $y$   |
|-------------|-------|--------|-------|-------|
| 20-29 years | 0.446 | 0.0996 | 0.176 | 0.219 |
| 30-39 years | 0.994 | 0.224  | 0.682 | 0.18  |
| 40-49 years | 0.97  | 0.226  | 0.68  | 0.162 |
| 50-59 years | 1.4   | 0.17   | 0.702 | 0.186 |
| 60-69 years | 1.21  | 0.649  | 0.373 | 0.389 |

range. Differences appear to be more pronounced for higher height, probably affected also by the gender distributions.

Table 12: Observable dependence on purpose for dyads with average height in the 150-160 cm range. Lengths in millimetres, times in seconds.

| Purpose     | $N_g^k$ | $V$                            | $r$                           | $x$                            | $y$                           |
|-------------|---------|--------------------------------|-------------------------------|--------------------------------|-------------------------------|
| Leisure     | 108     | $1107 \pm 25$ ( $\sigma=260$ ) | $821 \pm 26$ ( $\sigma=268$ ) | $629 \pm 15$ ( $\sigma=153$ )  | $389 \pm 34$ ( $\sigma=352$ ) |
| Work        | 10      | $1152 \pm 51$ ( $\sigma=160$ ) | $709 \pm 27$ ( $\sigma=86$ )  | $631 \pm 28$ ( $\sigma=88.5$ ) | $264 \pm 32$ ( $\sigma=101$ ) |
| $F_{1,116}$ |         | 0.283                          | 1.71                          | 0.00249                        | 1.24                          |
| $p$         |         | 0.596                          | 0.194                         | 0.96                           | 0.268                         |
| $R^2$       |         | 0.00243                        | 0.0145                        | $2.15 \cdot 10^{-5}$           | 0.0106                        |
| $\delta$    |         | 0.177                          | 0.434                         | 0.0166                         | 0.37                          |

Table 13: Observable dependence on purpose for dyads with average age in the 170-180 cm range. Lengths in millimetres, times in seconds.

| Purpose     | $N_g^k$ | $V$                            | $r$                           | $x$                           | $y$                           |
|-------------|---------|--------------------------------|-------------------------------|-------------------------------|-------------------------------|
| Leisure     | 188     | $1138 \pm 12$ ( $\sigma=168$ ) | $801 \pm 15$ ( $\sigma=212$ ) | $628 \pm 12$ ( $\sigma=159$ ) | $366 \pm 21$ ( $\sigma=291$ ) |
| Work        | 233     | $1291 \pm 10$ ( $\sigma=157$ ) | $850 \pm 15$ ( $\sigma=230$ ) | $730 \pm 10$ ( $\sigma=153$ ) | $322 \pm 18$ ( $\sigma=273$ ) |
| $F_{1,419}$ |         | 92.2                           | 5.22                          | 44                            | 2.53                          |
| $p$         |         | $< 10^{-8}$                    | 0.0228                        | $< 10^{-8}$                   | 0.113                         |
| $R^2$       |         | 0.18                           | 0.0123                        | 0.0951                        | 0.006                         |
| $\delta$    |         | 0.944                          | 0.225                         | 0.652                         | 0.156                         |

Table 14:  $p$  values for purpose corresponding to velocity and distance observables at different average age ranges.

| Average height | $V$         | $r$    | $x$         | $y$   |
|----------------|-------------|--------|-------------|-------|
| 150-160 cm     | 0.596       | 0.194  | 0.96        | 0.268 |
| 160-170 cm     | $< 10^{-8}$ | 0.0557 | 0.00126     | 0.953 |
| 170-180 cm     | $< 10^{-8}$ | 0.0228 | $< 10^{-8}$ | 0.113 |
| $> 180$ cm     | 0.773       | 0.959  | 0.289       | 0.522 |

Table 15:  $\delta$  values for purpose corresponding to velocity and distance observables at different average age ranges.

| Average height | $V$    | $r$    | $x$    | $y$     |
|----------------|--------|--------|--------|---------|
| 150-160 cm     | 0.177  | 0.434  | 0.0166 | 0.37    |
| 160-170 cm     | 0.696  | 0.217  | 0.368  | 0.00667 |
| 170-180 cm     | 0.944  | 0.225  | 0.652  | 0.156   |
| $> 180$ cm     | 0.0998 | 0.0177 | 0.368  | 0.22    |

## Secondary effects and relation

### Density

As discussed above, work-oriented (and thus colleagues) dyads are more present during working days, in which the environment presents a lower density. Tables 16 and 17 show the observables dependence for fixed density ranges ( $0 \leq \rho < 0.05$  ped/m<sup>2</sup> and  $0.15 \leq \rho < 0.2$  ped/m<sup>2</sup>, respectively). The major trends exposed in the main text are present at any density, as confirmed also by tables 18 and 19, reporting  $p$  and  $\delta$  values, respectively, for all density ranges.

Table 16: Observable dependence on relation for dyads in the  $0 \leq \rho < 0.05$  ped/m<sup>2</sup> range. Lengths in millimetres, times in seconds.

| Relation    | $N_g^k$ | $V$                            | $r$                           | $x$                           | $y$                           |
|-------------|---------|--------------------------------|-------------------------------|-------------------------------|-------------------------------|
| Colleagues  | 202     | 1276 $\pm$ 12 ( $\sigma=169$ ) | 934 $\pm$ 21 ( $\sigma=298$ ) | 751 $\pm$ 15 ( $\sigma=207$ ) | 409 $\pm$ 26 ( $\sigma=376$ ) |
| Couples     | 62      | 1103 $\pm$ 25 ( $\sigma=193$ ) | 760 $\pm$ 38 ( $\sigma=297$ ) | 600 $\pm$ 22 ( $\sigma=177$ ) | 359 $\pm$ 40 ( $\sigma=314$ ) |
| Families    | 125     | 1084 $\pm$ 19 ( $\sigma=208$ ) | 894 $\pm$ 30 ( $\sigma=331$ ) | 617 $\pm$ 16 ( $\sigma=175$ ) | 512 $\pm$ 37 ( $\sigma=413$ ) |
| Friends     | 193     | 1130 $\pm$ 17 ( $\sigma=230$ ) | 830 $\pm$ 19 ( $\sigma=258$ ) | 685 $\pm$ 12 ( $\sigma=162$ ) | 338 $\pm$ 23 ( $\sigma=326$ ) |
| $F_{3,578}$ |         | 30.5                           | 7.59                          | 19                            | 6.17                          |
| $p$         |         | $< 10^{-8}$                    | $5.52 \cdot 10^{-5}$          | $< 10^{-8}$                   | 0.000396                      |
| $R^2$       |         | 0.137                          | 0.0379                        | 0.0896                        | 0.031                         |
| $\delta$    |         | 1.03                           | 0.585                         | 0.754                         | 0.482                         |

Table 17: Observable dependence on relation for dyads in the  $0.15 \leq \rho < 0.2$  ped/m<sup>2</sup> range. Lengths in millimetres, times in seconds.

| Relation    | $N_g^k$ | $V$                            | $r$                           | $x$                            | $y$                           |
|-------------|---------|--------------------------------|-------------------------------|--------------------------------|-------------------------------|
| Colleagues  | 22      | 1229 $\pm$ 27 ( $\sigma=125$ ) | 754 $\pm$ 26 ( $\sigma=123$ ) | 673 $\pm$ 25 ( $\sigma=117$ )  | 237 $\pm$ 40 ( $\sigma=186$ ) |
| Couples     | 19      | 1064 $\pm$ 28 ( $\sigma=124$ ) | 663 $\pm$ 31 ( $\sigma=135$ ) | 542 $\pm$ 22 ( $\sigma=97.1$ ) | 290 $\pm$ 36 ( $\sigma=159$ ) |
| Families    | 68      | 1068 $\pm$ 22 ( $\sigma=180$ ) | 802 $\pm$ 30 ( $\sigma=247$ ) | 532 $\pm$ 21 ( $\sigma=170$ )  | 465 $\pm$ 44 ( $\sigma=362$ ) |
| Friends     | 57      | 1107 $\pm$ 22 ( $\sigma=168$ ) | 753 $\pm$ 22 ( $\sigma=164$ ) | 603 $\pm$ 20 ( $\sigma=149$ )  | 332 $\pm$ 33 ( $\sigma=251$ ) |
| $F_{3,162}$ |         | 5.54                           | 2.59                          | 5.87                           | 4.77                          |
| $p$         |         | 0.0012                         | 0.055                         | 0.000794                       | 0.00327                       |
| $R^2$       |         | 0.0931                         | 0.0457                        | 0.098                          | 0.0811                        |
| $\delta$    |         | 1.32                           | 0.613                         | 0.888                          | 0.694                         |

### Gender

We now compare the results regarding relation for groups of given gender (two females, mixed and two males) in tables 20, 21 and 22. Differences in the distributions (and the corresponding trends) are still significant in fixed gender groups, with the exception of the  $r$  female and male distributions, although, as shown by the relatively high  $\delta$  values, this may be due by the low amount of data in some categories. The patterns analysed in the main text are mostly respected, although we may notice some differences such

Table 18:  $p$  values for relation corresponding to velocity and distance observables at different density ranges.

| Density                     | $V$         | $r$                  | $x$         | $y$         |
|-----------------------------|-------------|----------------------|-------------|-------------|
| 0-0.05 ped/m <sup>2</sup>   | $< 10^{-8}$ | $5.52 \cdot 10^{-5}$ | $< 10^{-8}$ | 0.000396    |
| 0.05-0.1 ped/m <sup>2</sup> | $< 10^{-8}$ | 0.000158             | $< 10^{-8}$ | $< 10^{-8}$ |
| 0.1-0.15 ped/m <sup>2</sup> | $< 10^{-8}$ | $2.22 \cdot 10^{-5}$ | $< 10^{-8}$ | $< 10^{-8}$ |
| 0.15-0.2 ped/m <sup>2</sup> | 0.0012      | 0.055                | 0.000794    | 0.00327     |
| 0.2-0.25 ped/m <sup>2</sup> | 0.378       | 0.327                | 0.144       | 0.664       |

Table 19:  $\delta$  values for relation corresponding to velocity and distance observables at different density ranges.

| Density                     | $V$   | $r$   | $x$   | $y$   |
|-----------------------------|-------|-------|-------|-------|
| 0-0.05 ped/m <sup>2</sup>   | 1.03  | 0.585 | 0.754 | 0.482 |
| 0.05-0.1 ped/m <sup>2</sup> | 1.07  | 0.476 | 0.732 | 0.538 |
| 0.1-0.15 ped/m <sup>2</sup> | 1.16  | 0.666 | 0.857 | 0.761 |
| 0.15-0.2 ped/m <sup>2</sup> | 1.32  | 0.613 | 0.888 | 0.694 |
| 0.2-0.25 ped/m <sup>2</sup> | 0.675 | 0.798 | 0.983 | 0.974 |

as female friends walking at an higher distance than colleagues, and two male families walking at a very high speed.

Table 20: Observable dependence on relation for 2 females dyads. Lengths in millimetres, times in seconds.

| Relation    | $N_g^k$ | $V$                            | $r$                           | $x$                            | $y$                           |
|-------------|---------|--------------------------------|-------------------------------|--------------------------------|-------------------------------|
| Colleagues  | 24      | $1167 \pm 30$ ( $\sigma=145$ ) | $735 \pm 26$ ( $\sigma=128$ ) | $664 \pm 20$ ( $\sigma=95.9$ ) | $238 \pm 34$ ( $\sigma=168$ ) |
| Families    | 28      | $1023 \pm 32$ ( $\sigma=171$ ) | $847 \pm 58$ ( $\sigma=305$ ) | $565 \pm 27$ ( $\sigma=140$ )  | $488 \pm 77$ ( $\sigma=405$ ) |
| Friends     | 184     | $1105 \pm 15$ ( $\sigma=197$ ) | $777 \pm 15$ ( $\sigma=205$ ) | $658 \pm 8.5$ ( $\sigma=115$ ) | $293 \pm 20$ ( $\sigma=274$ ) |
| $F_{2,233}$ |         | 3.85                           | 1.9                           | 7.85                           | 6.48                          |
| $p$         |         | 0.0227                         | 0.153                         | 0.000503                       | 0.00182                       |
| $R^2$       |         | 0.032                          | 0.016                         | 0.0631                         | 0.0527                        |
| $\delta$    |         | 0.902                          | 0.465                         | 0.817                          | 0.783                         |

## Age

Tables 23 and 24 show the observables dependence for fixed minimum age ranges (20-29 and 50-59 years, respectively). The major trends exposed in the main text are present even when the age is kept fixed. We may notice that  $y$  assumes a very high value in families even when children are not present<sup>3</sup>.  $p$  and  $\delta$  values for the relation feature at different minimum age ranges are shown in, respectively, tables 25 and 26.

<sup>3</sup>This may be related to a selection bias in coders, that may have labelled mixed gender dyads as “couples” or “families” depending on their proximity and “abreastness”.

Table 21: Observable dependence on relation for mixed gender dyads. Lengths in millimetres, times in seconds.

| Relation    | $N_g^k$ | $V$                        | $r$                       | $x$                       | $y$                       |
|-------------|---------|----------------------------|---------------------------|---------------------------|---------------------------|
| Colleagues  | 35      | 1228 ± 30 ( $\sigma=175$ ) | 923 ± 55 ( $\sigma=327$ ) | 702 ± 27 ( $\sigma=158$ ) | 440 ± 75 ( $\sigma=445$ ) |
| Couples     | 96      | 1099 ± 17 ( $\sigma=169$ ) | 714 ± 22 ( $\sigma=219$ ) | 600 ± 15 ( $\sigma=150$ ) | 291 ± 24 ( $\sigma=231$ ) |
| Families    | 183     | 1078 ± 13 ( $\sigma=182$ ) | 860 ± 21 ( $\sigma=285$ ) | 588 ± 13 ( $\sigma=173$ ) | 493 ± 28 ( $\sigma=372$ ) |
| Friends     | 20      | 1153 ± 41 ( $\sigma=183$ ) | 820 ± 43 ( $\sigma=192$ ) | 616 ± 43 ( $\sigma=192$ ) | 391 ± 70 ( $\sigma=311$ ) |
| $F_{3,330}$ |         | 7.47                       | 7.99                      | 4.63                      | 7.26                      |
| $p$         |         | $7.49 \cdot 10^{-5}$       | $3.72 \cdot 10^{-5}$      | 0.00345                   | $9.96 \cdot 10^{-5}$      |
| $R^2$       |         | 0.0636                     | 0.0677                    | 0.0404                    | 0.0619                    |
| $\delta$    |         | 0.832                      | 0.83                      | 0.67                      | 0.61                      |

Table 22: Observable dependence on relation for 2 males dyads. Lengths in millimetres, times in seconds.

| Relation    | $N_g^k$ | $V$                         | $r$                       | $x$                        | $y$                       |
|-------------|---------|-----------------------------|---------------------------|----------------------------|---------------------------|
| Colleagues  | 299     | 1287 ± 8.8 ( $\sigma=152$ ) | 852 ± 13 ( $\sigma=220$ ) | 724 ± 9.3 ( $\sigma=160$ ) | 329 ± 16 ( $\sigma=273$ ) |
| Families    | 35      | 1234 ± 39 ( $\sigma=229$ )  | 891 ± 63 ( $\sigma=375$ ) | 571 ± 31 ( $\sigma=182$ )  | 537 ± 79 ( $\sigma=467$ ) |
| Friends     | 114     | 1187 ± 19 ( $\sigma=198$ )  | 811 ± 17 ( $\sigma=186$ ) | 676 ± 14 ( $\sigma=147$ )  | 335 ± 23 ( $\sigma=246$ ) |
| $F_{2,445}$ |         | 14.5                        | 2.1                       | 16.1                       | 8.35                      |
| $p$         |         | $8.13 \cdot 10^{-7}$        | 0.124                     | $1.76 \cdot 10^{-7}$       | 0.000276                  |
| $R^2$       |         | 0.0611                      | 0.00933                   | 0.0675                     | 0.0362                    |
| $\delta$    |         | 0.607                       | 0.329                     | 0.94                       | 0.698                     |

Table 23: Observable dependence on relation for dyads with minimum age in the 20-29 years range. Lengths in millimetres, times in seconds.

| Relation    | $N_g^k$ | $V$                        | $r$                       | $x$                       | $y$                       |
|-------------|---------|----------------------------|---------------------------|---------------------------|---------------------------|
| Colleagues  | 86      | 1255 ± 18 ( $\sigma=165$ ) | 813 ± 20 ( $\sigma=185$ ) | 706 ± 16 ( $\sigma=144$ ) | 291 ± 24 ( $\sigma=219$ ) |
| Couples     | 74      | 1115 ± 19 ( $\sigma=165$ ) | 711 ± 27 ( $\sigma=229$ ) | 600 ± 18 ( $\sigma=154$ ) | 281 ± 28 ( $\sigma=243$ ) |
| Families    | 23      | 1109 ± 39 ( $\sigma=187$ ) | 877 ± 58 ( $\sigma=277$ ) | 581 ± 37 ( $\sigma=177$ ) | 527 ± 78 ( $\sigma=373$ ) |
| Friends     | 164     | 1186 ± 13 ( $\sigma=164$ ) | 801 ± 16 ( $\sigma=208$ ) | 683 ± 10 ( $\sigma=128$ ) | 298 ± 21 ( $\sigma=265$ ) |
| $F_{3,343}$ |         | 10.9                       | 5.05                      | 11.1                      | 5.9                       |
| $p$         |         | $7.21 \cdot 10^{-7}$       | 0.00195                   | $5.89 \cdot 10^{-7}$      | 0.00062                   |
| $R^2$       |         | 0.0872                     | 0.0423                    | 0.0883                    | 0.0491                    |
| $\delta$    |         | 0.861                      | 0.684                     | 0.825                     | 0.882                     |

## Height

Tables 27 and 28 show the observables dependence for fixed average height ranges (160-170 and 170-180 cm, respectively), showing that the distributions are still different in a significant way, and that the major patterns exposed in the main text are confirmed. Tables 29 and 30 show respectively the  $p$  and  $\delta$  values for all height ranges.  $\delta$  values are always high showing that some reduced  $p$  values are due to the low number of groups in some ranges.



Table 24: Observable dependence on relation for dyads with minimum age in the 50-59 years range. Lengths in millimetres, times in seconds.

| Relation   | $N_g^k$ | $V$                            | $r$                           | $x$                           | $y$                           |
|------------|---------|--------------------------------|-------------------------------|-------------------------------|-------------------------------|
| Colleagues | 52      | $1274 \pm 22$ ( $\sigma=159$ ) | $844 \pm 24$ ( $\sigma=172$ ) | $700 \pm 20$ ( $\sigma=142$ ) | $350 \pm 36$ ( $\sigma=263$ ) |
| Families   | 28      | $1048 \pm 32$ ( $\sigma=169$ ) | $846 \pm 55$ ( $\sigma=289$ ) | $562 \pm 34$ ( $\sigma=182$ ) | $492 \pm 78$ ( $\sigma=410$ ) |
| Friends    | 22      | $1051 \pm 36$ ( $\sigma=167$ ) | $759 \pm 44$ ( $\sigma=208$ ) | $637 \pm 24$ ( $\sigma=115$ ) | $308 \pm 59$ ( $\sigma=276$ ) |
| $F_{2,99}$ |         | 23.4                           | 1.29                          | 7.63                          | 2.55                          |
| $p$        |         | $< 10^{-8}$                    | 0.28                          | 0.000825                      | 0.0835                        |
| $R^2$      |         | 0.321                          | 0.0254                        | 0.134                         | 0.0489                        |
| $\delta$   |         | 1.39                           | 0.339                         | 0.878                         | 0.514                         |

Table 25:  $p$  values for relation in different minimum age ranges.

| Minimum age     | $V$                  | $r$     | $x$                  | $y$     |
|-----------------|----------------------|---------|----------------------|---------|
| 10-19 years     | 0.558                | 0.049   | 0.615                | 0.0313  |
| 20-29 years     | $7.21 \cdot 10^{-7}$ | 0.00195 | $5.89 \cdot 10^{-7}$ | 0.00062 |
| 30-39 years     | $< 10^{-8}$          | 0.0128  | $< 10^{-8}$          | 0.0513  |
| 40-49 years     | $1.02 \cdot 10^{-5}$ | 0.39    | 0.000266             | 0.537   |
| 50-59 years     | $< 10^{-8}$          | 0.28    | 0.000825             | 0.0835  |
| 60-69 years     | 0.0525               | 0.248   | 0.745                | 0.388   |
| $\geq 70$ years | 0.385                | 0.251   | 0.198                | 0.237   |

Table 26:  $\delta$  values for relation in different minimum age ranges.

| Minimum age     | $V$   | $r$   | $x$   | $y$   |
|-----------------|-------|-------|-------|-------|
| 10-19 years     | 0.888 | 3.23  | 0.609 | 2.49  |
| 20-29 years     | 0.861 | 0.684 | 0.825 | 0.882 |
| 30-39 years     | 1.48  | 0.77  | 1.05  | 0.636 |
| 40-49 years     | 1.2   | 0.529 | 0.848 | 0.557 |
| 50-59 years     | 1.39  | 0.339 | 0.878 | 0.514 |
| 60-69 years     | 1.21  | 1.12  | 0.386 | 0.669 |
| $\geq 70$ years | 0.612 | 0.844 | 0.937 | 0.865 |

Table 27: Observable dependence on relation for dyads with average height in the 160-170 cm range. Lengths in millimetres, times in seconds.

| Relation    | $N_g^k$ | $V$                            | $r$                           | $x$                           | $y$                           |
|-------------|---------|--------------------------------|-------------------------------|-------------------------------|-------------------------------|
| Colleagues  | 89      | $1240 \pm 16$ ( $\sigma=149$ ) | $862 \pm 26$ ( $\sigma=249$ ) | $686 \pm 18$ ( $\sigma=167$ ) | $380 \pm 37$ ( $\sigma=350$ ) |
| Couples     | 47      | $1106 \pm 28$ ( $\sigma=191$ ) | $731 \pm 33$ ( $\sigma=226$ ) | $622 \pm 28$ ( $\sigma=189$ ) | $287 \pm 30$ ( $\sigma=204$ ) |
| Families    | 121     | $1090 \pm 18$ ( $\sigma=196$ ) | $854 \pm 27$ ( $\sigma=295$ ) | $593 \pm 15$ ( $\sigma=169$ ) | $487 \pm 34$ ( $\sigma=371$ ) |
| Friends     | 172     | $1135 \pm 13$ ( $\sigma=169$ ) | $798 \pm 17$ ( $\sigma=221$ ) | $659 \pm 10$ ( $\sigma=131$ ) | $321 \pm 23$ ( $\sigma=302$ ) |
| $F_{3,425}$ |         | 13.3                           | 3.96                          | 7.08                          | 7.42                          |
| $p$         |         | $2.47 \cdot 10^{-8}$           | 0.0084                        | 0.000119                      | $7.42 \cdot 10^{-5}$          |
| $R^2$       |         | 0.086                          | 0.0272                        | 0.0476                        | 0.0498                        |
| $\delta$    |         | 0.843                          | 0.542                         | 0.551                         | 0.599                         |

Table 28: Observable dependence on relation for dyads with average age in the 170-180 cm range. Lengths in millimetres, times in seconds.

| Relation    | $N_g^k$ | $V$                            | $r$                           | $x$                            | $y$                           |
|-------------|---------|--------------------------------|-------------------------------|--------------------------------|-------------------------------|
| Colleagues  | 231     | 1293 $\pm$ 10 ( $\sigma=157$ ) | 859 $\pm$ 15 ( $\sigma=232$ ) | 738 $\pm$ 10 ( $\sigma=157$ )  | 325 $\pm$ 18 ( $\sigma=274$ ) |
| Couples     | 45      | 1089 $\pm$ 22 ( $\sigma=145$ ) | 700 $\pm$ 33 ( $\sigma=219$ ) | 576 $\pm$ 14 ( $\sigma=95.4$ ) | 300 $\pm$ 39 ( $\sigma=264$ ) |
| Families    | 56      | 1107 $\pm$ 22 ( $\sigma=166$ ) | 818 $\pm$ 31 ( $\sigma=234$ ) | 557 $\pm$ 20 ( $\sigma=148$ )  | 462 $\pm$ 48 ( $\sigma=361$ ) |
| Friends     | 71      | 1162 $\pm$ 20 ( $\sigma=166$ ) | 811 $\pm$ 19 ( $\sigma=156$ ) | 679 $\pm$ 17 ( $\sigma=145$ )  | 328 $\pm$ 26 ( $\sigma=215$ ) |
| $F_{3,399}$ |         | 38.9                           | 6.77                          | 31.5                           | 4.13                          |
| $p$         |         | $< 10^{-8}$                    | 0.000183                      | $< 10^{-8}$                    | 0.00672                       |
| $R^2$       |         | 0.226                          | 0.0485                        | 0.192                          | 0.0301                        |
| $\delta$    |         | 1.32                           | 0.692                         | 1.16                           | 0.503                         |

Table 29:  $p$  values for relation at different average height ranges.

| Average height | $V$                  | $r$      | $x$         | $y$                  |
|----------------|----------------------|----------|-------------|----------------------|
| < 140 cm       | 0.362                | 0.108    | 0.61        | 0.0849               |
| 140-150 cm     | 0.12                 | 0.181    | 0.785       | 0.299                |
| 150-160 cm     | 0.842                | 0.133    | 0.803       | 0.0402               |
| 160-170 cm     | $2.47 \cdot 10^{-8}$ | 0.0084   | 0.000119    | $7.42 \cdot 10^{-5}$ |
| 170-180 cm     | $< 10^{-8}$          | 0.000183 | $< 10^{-8}$ | 0.00672              |
| > 180 cm       | 0.00432              | 0.551    | 0.126       | 0.951                |

Table 30:  $\delta$  values for relation at different average height ranges.

| Average height | $V$   | $r$   | $x$   | $y$   |
|----------------|-------|-------|-------|-------|
| < 140 cm       | 0.767 | 1.41  | 0.423 | 1.53  |
| 140-150 cm     | 0.977 | 0.798 | 0.159 | 0.612 |
| 150-160 cm     | 0.405 | 0.658 | 0.521 | 0.594 |
| 160-170 cm     | 0.843 | 0.542 | 0.551 | 0.599 |
| 170-180 cm     | 1.32  | 0.692 | 1.16  | 0.503 |
| > 180 cm       | 2.78  | 0.972 | 1.41  | 0.331 |

## Secondary effects and gender

### Density

Tables 31 and 32 show the dependence on gender of observables at fixed density ranges ( $0 \leq \rho < 0.05$  ped/m<sup>2</sup> and  $0.15 \leq \rho < 0.2$  ped/m<sup>2</sup>, respectively). We may see that only the  $r$  observable loses the statistically significant gender dependence at high density (but still shows it at lower density, when pedestrians may move more freely; furthermore, the effect size is almost not affected by density), while the other observables show it at low and high density. Tables 33 and 34 show the dependence of, respectively, the gender  $p$  and  $\delta$  values at different density values.

Table 31: Observable dependence on gender in the  $0 \leq \rho < 0.05$  ped/m<sup>2</sup> density range. Lengths in millimetres, times in seconds.

| Gender      | $N_g^k$ | $V$                            | $r$                           | $x$                           | $y$                           |
|-------------|---------|--------------------------------|-------------------------------|-------------------------------|-------------------------------|
| Two females | 160     | 1095 $\pm$ 17 ( $\sigma=219$ ) | 818 $\pm$ 21 ( $\sigma=267$ ) | 669 $\pm$ 11 ( $\sigma=138$ ) | 337 $\pm$ 27 ( $\sigma=346$ ) |
| Mixed       | 217     | 1112 $\pm$ 13 ( $\sigma=196$ ) | 870 $\pm$ 23 ( $\sigma=340$ ) | 642 $\pm$ 13 ( $\sigma=194$ ) | 448 $\pm$ 28 ( $\sigma=409$ ) |
| Two males   | 259     | 1254 $\pm$ 12 ( $\sigma=196$ ) | 914 $\pm$ 18 ( $\sigma=283$ ) | 733 $\pm$ 13 ( $\sigma=217$ ) | 404 $\pm$ 22 ( $\sigma=351$ ) |
| $F_{2,633}$ |         | 41.5                           | 5.06                          | 14.1                          | 4.11                          |
| $p$         |         | $< 10^{-8}$                    | 0.00658                       | $1.04 \cdot 10^{-6}$          | 0.0169                        |
| $R^2$       |         | 0.116                          | 0.0157                        | 0.0426                        | 0.0128                        |
| $\delta$    |         | 0.771                          | 0.346                         | 0.441                         | 0.289                         |

Table 32: Observable dependence on gender in the  $0.15 \leq \rho < 0.2$  ped/m<sup>2</sup> density range. Lengths in millimetres, times in seconds.

| Gender      | $N_g^k$ | $V$                            | $r$                           | $x$                           | $y$                           |
|-------------|---------|--------------------------------|-------------------------------|-------------------------------|-------------------------------|
| Two females | 35      | 1073 $\pm$ 28 ( $\sigma=164$ ) | 714 $\pm$ 26 ( $\sigma=152$ ) | 572 $\pm$ 18 ( $\sigma=107$ ) | 318 $\pm$ 39 ( $\sigma=230$ ) |
| Mixed       | 73      | 1062 $\pm$ 18 ( $\sigma=152$ ) | 782 $\pm$ 29 ( $\sigma=247$ ) | 521 $\pm$ 20 ( $\sigma=172$ ) | 448 $\pm$ 42 ( $\sigma=361$ ) |
| Two males   | 59      | 1171 $\pm$ 23 ( $\sigma=178$ ) | 767 $\pm$ 19 ( $\sigma=147$ ) | 644 $\pm$ 18 ( $\sigma=136$ ) | 304 $\pm$ 28 ( $\sigma=218$ ) |
| $F_{2,164}$ |         | 7.81                           | 1.4                           | 11.2                          | 4.6                           |
| $p$         |         | 0.000578                       | 0.249                         | $2.88 \cdot 10^{-5}$          | 0.0114                        |
| $R^2$       |         | 0.0869                         | 0.0168                        | 0.12                          | 0.0531                        |
| $\delta$    |         | 0.665                          | 0.308                         | 0.786                         | 0.471                         |

Table 33:  $p$  values for gender in different density ranges.

| Density                     | $V$         | $r$     | $x$                  | $y$     |
|-----------------------------|-------------|---------|----------------------|---------|
| 0-0.05 ped/m <sup>2</sup>   | $< 10^{-8}$ | 0.00658 | $1.04 \cdot 10^{-6}$ | 0.0169  |
| 0.05-0.1 ped/m <sup>2</sup> | $< 10^{-8}$ | 0.0448  | $< 10^{-8}$          | 0.00164 |
| 0.1-0.15 ped/m <sup>2</sup> | $< 10^{-8}$ | 0.897   | $9.41 \cdot 10^{-8}$ | 0.00478 |
| 0.15-0.2 ped/m <sup>2</sup> | 0.000578    | 0.249   | $2.88 \cdot 10^{-5}$ | 0.0114  |
| 0.2-0.25 ped/m <sup>2</sup> | 0.0304      | 0.0628  | 0.31                 | 0.43    |

Table 34:  $\delta$  values for gender in different density ranges.

| Density                     | $V$   | $r$    | $x$   | $y$   |
|-----------------------------|-------|--------|-------|-------|
| 0-0.05 ped/m <sup>2</sup>   | 0.771 | 0.346  | 0.441 | 0.289 |
| 0.05-0.1 ped/m <sup>2</sup> | 0.771 | 0.235  | 0.537 | 0.291 |
| 0.1-0.15 ped/m <sup>2</sup> | 0.737 | 0.0554 | 0.582 | 0.35  |
| 0.15-0.2 ped/m <sup>2</sup> | 0.665 | 0.308  | 0.786 | 0.471 |
| 0.2-0.25 ped/m <sup>2</sup> | 1.31  | 1.56   | 0.942 | 0.751 |

## Relation

Tables 35, 36 and 37 show the gender dependence of observables in, respectively, colleagues, families and friends (couples are not shown being exclusively of mixed gender).

Table 35: Observable dependence on gender for colleagues. Lengths in millimetres, times in seconds.

| Gender      | $N_g^k$ | $V$                             | $r$                           | $x$                            | $y$                           |
|-------------|---------|---------------------------------|-------------------------------|--------------------------------|-------------------------------|
| Two females | 24      | 1167 $\pm$ 30 ( $\sigma=145$ )  | 735 $\pm$ 26 ( $\sigma=128$ ) | 664 $\pm$ 20 ( $\sigma=95.9$ ) | 238 $\pm$ 34 ( $\sigma=168$ ) |
| Mixed       | 35      | 1228 $\pm$ 30 ( $\sigma=175$ )  | 923 $\pm$ 55 ( $\sigma=327$ ) | 702 $\pm$ 27 ( $\sigma=158$ )  | 440 $\pm$ 75 ( $\sigma=445$ ) |
| Two males   | 299     | 1287 $\pm$ 8.8 ( $\sigma=152$ ) | 852 $\pm$ 13 ( $\sigma=220$ ) | 724 $\pm$ 9.3 ( $\sigma=160$ ) | 329 $\pm$ 16 ( $\sigma=273$ ) |
| $F_{2,355}$ |         | 8.49                            | 4.82                          | 1.78                           | 3.7                           |
| $p$         |         | 0.00025                         | 0.00862                       | 0.17                           | 0.0256                        |
| $R^2$       |         | 0.0457                          | 0.0264                        | 0.00995                        | 0.0204                        |
| $\delta$    |         | 0.798                           | 0.709                         | 0.38                           | 0.561                         |

Table 36: Observable dependence on gender for families. Lengths in millimetres, times in seconds.

| Gender      | $N_g^k$ | $V$                            | $r$                           | $x$                           | $y$                           |
|-------------|---------|--------------------------------|-------------------------------|-------------------------------|-------------------------------|
| Two females | 28      | 1023 $\pm$ 32 ( $\sigma=171$ ) | 847 $\pm$ 58 ( $\sigma=305$ ) | 565 $\pm$ 27 ( $\sigma=140$ ) | 488 $\pm$ 77 ( $\sigma=405$ ) |
| Mixed       | 183     | 1078 $\pm$ 13 ( $\sigma=182$ ) | 860 $\pm$ 21 ( $\sigma=285$ ) | 588 $\pm$ 13 ( $\sigma=173$ ) | 493 $\pm$ 28 ( $\sigma=372$ ) |
| Two males   | 35      | 1234 $\pm$ 39 ( $\sigma=229$ ) | 891 $\pm$ 63 ( $\sigma=375$ ) | 571 $\pm$ 31 ( $\sigma=182$ ) | 537 $\pm$ 79 ( $\sigma=467$ ) |
| $F_{2,243}$ |         | 12.3                           | 0.197                         | 0.308                         | 0.198                         |
| $p$         |         | $8.41 \cdot 10^{-6}$           | 0.821                         | 0.735                         | 0.821                         |
| $R^2$       |         | 0.0917                         | 0.00162                       | 0.00253                       | 0.00163                       |
| $\delta$    |         | 1.03                           | 0.128                         | 0.135                         | 0.112                         |

We may see that males dyads are farther and faster than female ones regardless of relation (although the differences in  $r$ ,  $x$  and  $y$  are quite reduced in families and friends). Mixed dyad behaviour, on the other hand, depends strongly on relation. Mixed dyads are the only ones including couples, and this affects strongly their behaviour, and represent also the largest part of families. They are very little represented in friends (interestingly, mixed dyads of friends walk much closer, in abreast distance, than same sex dyads, although their absolute distance is higher than in females). The ‘‘colleagues’’

Table 37: Observable dependence on gender for friends. Lengths in millimetres, times in seconds.

| Gender      | $N_g^k$ | $V$                        | $r$                       | $x$                        | $y$                       |
|-------------|---------|----------------------------|---------------------------|----------------------------|---------------------------|
| Two females | 184     | 1105 ± 15 ( $\sigma=197$ ) | 777 ± 15 ( $\sigma=205$ ) | 658 ± 8.5 ( $\sigma=115$ ) | 293 ± 20 ( $\sigma=274$ ) |
| Mixed       | 20      | 1153 ± 41 ( $\sigma=183$ ) | 820 ± 43 ( $\sigma=192$ ) | 616 ± 43 ( $\sigma=192$ )  | 391 ± 70 ( $\sigma=311$ ) |
| Two males   | 114     | 1187 ± 19 ( $\sigma=198$ ) | 811 ± 17 ( $\sigma=186$ ) | 676 ± 14 ( $\sigma=147$ )  | 335 ± 23 ( $\sigma=246$ ) |
| $F_{2,315}$ |         | 6.02                       | 1.27                      | 1.91                       | 1.76                      |
| $p$         |         | 0.00272                    | 0.283                     | 0.15                       | 0.173                     |
| $R^2$       |         | 0.0368                     | 0.00798                   | 0.012                      | 0.0111                    |
| $\delta$    |         | 0.412                      | 0.213                     | 0.388                      | 0.354                     |

category could represent a fair field for comparing the effect of gender, and in it the mixed behaviour is somehow in between the two sexes (although the absolute distance  $r$  and group depth  $y$  are very large, suggesting not abreast formations) but in our set colleagues are extremely biased towards males, and thus the analysis is hindered by low female and mixed dyads numbers. Finally we may notice that in families and friends, the effect of gender on distance ( $r$ ,  $x$  and  $y$ ) is very reduced, but the one on velocity is persistent. The velocity effect size in families is nevertheless more than two times the one for friends.

## Age

Tables 38 and 39 show the dependence on gender of observables at fixed average age ranges (20-29 years and 50-59 years, respectively). Interestingly, the differences between young two females and two males dyads are reduced (and almost absent regarding the distance observables  $r$ ,  $x$  and  $y$ ), while they are very strong in elder groups. Young mixed dyad behaviour is strongly influenced by the presence of couples.

Table 38: Observable dependence on gender in the 20-29 years average age range. Lengths in millimetres, times in seconds.

| Gender      | $N_g^k$ | $V$                        | $r$                       | $x$                       | $y$                       |
|-------------|---------|----------------------------|---------------------------|---------------------------|---------------------------|
| Two females | 111     | 1166 ± 16 ( $\sigma=170$ ) | 791 ± 21 ( $\sigma=220$ ) | 686 ± 10 ( $\sigma=110$ ) | 275 ± 26 ( $\sigma=271$ ) |
| Mixed       | 125     | 1122 ± 16 ( $\sigma=175$ ) | 784 ± 23 ( $\sigma=255$ ) | 612 ± 16 ( $\sigma=182$ ) | 360 ± 27 ( $\sigma=307$ ) |
| Two males   | 134     | 1247 ± 14 ( $\sigma=164$ ) | 803 ± 17 ( $\sigma=201$ ) | 689 ± 13 ( $\sigma=148$ ) | 301 ± 20 ( $\sigma=235$ ) |
| $F_{2,367}$ |         | 18                         | 0.235                     | 10.5                      | 3.03                      |
| $p$         |         | $3.37 \cdot 10^{-8}$       | 0.791                     | $3.77 \cdot 10^{-5}$      | 0.0496                    |
| $R^2$       |         | 0.0895                     | 0.00128                   | 0.054                     | 0.0162                    |
| $\delta$    |         | 0.739                      | 0.0832                    | 0.47                      | 0.291                     |

Tables 40 and 41 show the  $p$  and  $\delta$  values for gender in different average age ranges. Minimum ages ranges are shown in tables 42 and 43.

Table 39: Observable dependence on gender in the 50-59 years average age range. Lengths in millimetres, times in seconds.

| Gender      | $N_g^k$ | $V$                            | $r$                            | $x$                           | $y$                           |
|-------------|---------|--------------------------------|--------------------------------|-------------------------------|-------------------------------|
| Two females | 20      | 1010 $\pm$ 30 ( $\sigma=136$ ) | 708 $\pm$ 21 ( $\sigma=95.5$ ) | 613 $\pm$ 27 ( $\sigma=121$ ) | 254 $\pm$ 34 ( $\sigma=151$ ) |
| Mixed       | 34      | 1071 $\pm$ 29 ( $\sigma=170$ ) | 856 $\pm$ 48 ( $\sigma=278$ )  | 608 $\pm$ 32 ( $\sigma=189$ ) | 462 $\pm$ 66 ( $\sigma=388$ ) |
| Two males   | 60      | 1255 $\pm$ 22 ( $\sigma=168$ ) | 847 $\pm$ 25 ( $\sigma=192$ )  | 686 $\pm$ 18 ( $\sigma=141$ ) | 369 $\pm$ 38 ( $\sigma=298$ ) |
| $F_{2,111}$ |         | 22.8                           | 3.69                           | 3.37                          | 2.81                          |
| $p$         |         | $< 10^{-8}$                    | 0.0281                         | 0.0379                        | 0.0643                        |
| $R^2$       |         | 0.291                          | 0.0623                         | 0.0573                        | 0.0482                        |
| $\delta$    |         | 1.52                           | 0.646                          | 0.486                         | 0.646                         |

Table 40:  $p$  values for gender in different average age ranges.

| Average age     | $V$                  | $r$    | $x$                  | $y$    |
|-----------------|----------------------|--------|----------------------|--------|
| 10-19 years     | 0.0301               | 0.685  | 0.573                | 0.903  |
| 20-29 years     | $3.37 \cdot 10^{-8}$ | 0.791  | $3.77 \cdot 10^{-5}$ | 0.0496 |
| 30-39 years     | $< 10^{-8}$          | 0.0477 | $7.66 \cdot 10^{-8}$ | 0.0433 |
| 40-49 years     | $< 10^{-8}$          | 0.106  | 0.000167             | 0.856  |
| 50-59 years     | $< 10^{-8}$          | 0.0281 | 0.0379               | 0.0643 |
| 60-69 years     | 0.00145              | 0.495  | 0.17                 | 0.655  |
| $\geq 70$ years | 0.245                | 0.564  | 0.543                | 0.598  |

Table 41:  $\delta$  values for gender in different average age ranges.

| Average age     | $V$   | $r$    | $x$   | $y$    |
|-----------------|-------|--------|-------|--------|
| 10-19 years     | 0.769 | 0.241  | 0.309 | 0.14   |
| 20-29 years     | 0.739 | 0.0832 | 0.47  | 0.291  |
| 30-39 years     | 0.87  | 0.48   | 0.732 | 0.322  |
| 40-49 years     | 1.3   | 0.329  | 0.619 | 0.0946 |
| 50-59 years     | 1.52  | 0.646  | 0.486 | 0.646  |
| 60-69 years     | 1.49  | 0.457  | 0.666 | 0.27   |
| $\geq 70$ years | 1.56  | 0.802  | 0.915 | 0.788  |

Table 42:  $p$  values for gender in different minimum age ranges.

| Minimum age     | $V$                  | $r$    | $x$                  | $y$    |
|-----------------|----------------------|--------|----------------------|--------|
| 0-9 years       | 0.0872               | 0.17   | 0.577                | 0.198  |
| 10-19 years     | 0.00563              | 0.497  | 0.981                | 0.484  |
| 20-29 years     | $1.67 \cdot 10^{-7}$ | 0.665  | $8.91 \cdot 10^{-5}$ | 0.0654 |
| 30-39 years     | $< 10^{-8}$          | 0.0904 | $1.99 \cdot 10^{-8}$ | 0.027  |
| 40-49 years     | $3.02 \cdot 10^{-8}$ | 0.193  | 0.000602             | 0.778  |
| 50-59 years     | $3.78 \cdot 10^{-8}$ | 0.0458 | 0.0555               | 0.0743 |
| 60-69 years     | 0.00245              | 0.446  | 0.105                | 0.651  |
| $\geq 70$ years | 0.245                | 0.564  | 0.543                | 0.598  |

Table 43:  $\delta$  values for gender in different minimum age ranges.

| Minimum age     | $V$   | $r$   | $x$    | $y$   |
|-----------------|-------|-------|--------|-------|
| 0-9 years       | 1.11  | 1.21  | 0.449  | 1.17  |
| 10-19 years     | 0.949 | 0.473 | 0.0487 | 0.421 |
| 20-29 years     | 0.715 | 0.111 | 0.475  | 0.271 |
| 30-39 years     | 0.907 | 0.396 | 0.749  | 0.306 |
| 40-49 years     | 1.62  | 0.343 | 0.65   | 0.113 |
| 50-59 years     | 1.47  | 0.616 | 0.487  | 0.659 |
| 60-69 years     | 1.45  | 0.541 | 0.79   | 0.275 |
| $\geq 70$ years | 1.56  | 0.802 | 0.915  | 0.788 |

## Height

Tables 44 and 45 show the dependence on gender of observables at fixed average height ranges (150-160 and 170-180 cm, respectively). The results (in particular for the shorter height range the effect size, that helps in dealing with the reduced number of groups) show that differences between the sexes are still present when we consider individuals of similar height.

Table 44: Observable dependence on gender in the 150-160 cm average height range. Lengths in millimetres, times in seconds.

| Gender      | $N_g^k$ | $V$                            | $r$                           | $x$                           | $y$                            |
|-------------|---------|--------------------------------|-------------------------------|-------------------------------|--------------------------------|
| Two females | 75      | 1094 $\pm$ 27 ( $\sigma=232$ ) | 791 $\pm$ 26 ( $\sigma=225$ ) | 627 $\pm$ 15 ( $\sigma=131$ ) | 352 $\pm$ 36 ( $\sigma=316$ )  |
| Mixed       | 25      | 1045 $\pm$ 35 ( $\sigma=176$ ) | 796 $\pm$ 43 ( $\sigma=217$ ) | 603 $\pm$ 33 ( $\sigma=167$ ) | 376 $\pm$ 60 ( $\sigma=300$ )  |
| Two males   | 18      | 1272 $\pm$ 82 ( $\sigma=346$ ) | 921 $\pm$ 92 ( $\sigma=390$ ) | 674 $\pm$ 42 ( $\sigma=180$ ) | 493 $\pm$ 110 ( $\sigma=447$ ) |
| $F_{2,115}$ |         | 4.95                           | 1.89                          | 1.22                          | 1.24                           |
| $p$         |         | 0.00869                        | 0.156                         | 0.3                           | 0.294                          |
| $R^2$       |         | 0.0792                         | 0.0318                        | 0.0207                        | 0.0211                         |
| $\delta$    |         | 0.873                          | 0.493                         | 0.415                         | 0.408                          |

Table 45: Observable dependence on gender in the 170-180 cm average height range. Lengths in millimetres, times in seconds.

| Gender      | $N_g^k$ | $V$                             | $r$                           | $x$                            | $y$                           |
|-------------|---------|---------------------------------|-------------------------------|--------------------------------|-------------------------------|
| Two females | 16      | 1091 $\pm$ 48 ( $\sigma=191$ )  | 741 $\pm$ 30 ( $\sigma=119$ ) | 662 $\pm$ 22 ( $\sigma=88.5$ ) | 238 $\pm$ 32 ( $\sigma=128$ ) |
| Mixed       | 121     | 1127 $\pm$ 16 ( $\sigma=171$ )  | 797 $\pm$ 23 ( $\sigma=250$ ) | 598 $\pm$ 14 ( $\sigma=149$ )  | 396 $\pm$ 31 ( $\sigma=338$ ) |
| Two males   | 284     | 1270 $\pm$ 9.6 ( $\sigma=161$ ) | 846 $\pm$ 13 ( $\sigma=213$ ) | 723 $\pm$ 9.4 ( $\sigma=159$ ) | 324 $\pm$ 15 ( $\sigma=258$ ) |
| $F_{2,418}$ |         | 36.7                            | 3.4                           | 27.8                           | 3.89                          |
| $p$         |         | $< 10^{-8}$                     | 0.0344                        | $< 10^{-8}$                    | 0.0212                        |
| $R^2$       |         | 0.149                           | 0.016                         | 0.117                          | 0.0183                        |
| $\delta$    |         | 1.1                             | 0.502                         | 0.799                          | 0.492                         |

Tables 46 and 47 show, respectively, the gender  $p$  and  $\delta$  values for different average height ranges.

Table 46: Gender  $p$  values for different average height ranges.

| Average height | $V$                 | $r$    | $x$         | $y$      |
|----------------|---------------------|--------|-------------|----------|
| < 140 cm       | 0.614               | 0.0596 | 0.958       | 0.148    |
| 140-150 cm     | 0.000737            | 0.372  | 0.0226      | 0.306    |
| 150-160 cm     | 0.00869             | 0.156  | 0.3         | 0.294    |
| 160-170 cm     | $1.0 \cdot 10^{-5}$ | 0.0653 | 0.0212      | 0.000455 |
| 170-180 cm     | $< 10^{-8}$         | 0.0344 | $< 10^{-8}$ | 0.0212   |
| > 180 cm       | 0.0241              | 0.191  | 0.137       | 0.647    |

Table 47: Gender  $\delta$  values for different average height ranges.

| Average height | $V$   | $r$   | $x$   | $y$   |
|----------------|-------|-------|-------|-------|
| < 140 cm       | 0.774 | 1.89  | 0.183 | 1.39  |
| 140-150 cm     | 2.06  | 0.693 | 1.47  | 0.868 |
| 150-160 cm     | 0.873 | 0.493 | 0.415 | 0.408 |
| 160-170 cm     | 0.523 | 0.279 | 0.235 | 0.416 |
| 170-180 cm     | 1.1   | 0.502 | 0.799 | 0.492 |
| > 180 cm       | 1.28  | 0.708 | 0.811 | 0.246 |



## Secondary effects and age

### Density

Tables 48 and 49 show the age dependence of observables in, respectively, the  $0 \leq \rho \leq 0.05$  ped/m<sup>2</sup> and  $0.15 \leq \rho \leq 0.2$  ped/m<sup>2</sup> density ranges. Results mostly reflect those of the main text, with high or relatively high  $\delta$  values suggesting that some not very good  $p$  values may be due to the scarcity of data in the children and elderly categories (i.e. the categories with the most different behaviour). A remarkable feature, presented with the caveats related to sensor noise in the tracking of children, is that while in general velocity decreases with density, this is not true for dyads with children, as shown in the supplementary figure S3.

Table 48: Observable dependence on minimum age in the  $0 \leq \rho \leq 0.05$  ped/m<sup>2</sup> density range. Lengths in millimetres, times in seconds.

| Minimum age | $N_g^k$ | $V$                        | $r$                        | $x$                        | $y$                        |
|-------------|---------|----------------------------|----------------------------|----------------------------|----------------------------|
| 0-9 years   | 9       | 1075 ± 68 ( $\sigma=205$ ) | 1078 ± 97 ( $\sigma=291$ ) | 663 ± 62 ( $\sigma=186$ )  | 704 ± 140 ( $\sigma=414$ ) |
| 10-19 years | 44      | 1175 ± 43 ( $\sigma=288$ ) | 802 ± 40 ( $\sigma=262$ )  | 661 ± 25 ( $\sigma=167$ )  | 337 ± 44 ( $\sigma=294$ )  |
| 20-29 years | 184     | 1198 ± 14 ( $\sigma=196$ ) | 853 ± 23 ( $\sigma=313$ )  | 694 ± 14 ( $\sigma=193$ )  | 357 ± 27 ( $\sigma=372$ )  |
| 30-39 years | 185     | 1196 ± 16 ( $\sigma=217$ ) | 894 ± 22 ( $\sigma=306$ )  | 696 ± 16 ( $\sigma=223$ )  | 418 ± 27 ( $\sigma=368$ )  |
| 40-49 years | 87      | 1150 ± 20 ( $\sigma=191$ ) | 909 ± 32 ( $\sigma=297$ )  | 683 ± 22 ( $\sigma=202$ )  | 440 ± 42 ( $\sigma=395$ )  |
| 50-59 years | 71      | 1157 ± 23 ( $\sigma=198$ ) | 844 ± 27 ( $\sigma=228$ )  | 678 ± 18 ( $\sigma=149$ )  | 381 ± 38 ( $\sigma=320$ )  |
| 60-69 years | 47      | 1022 ± 25 ( $\sigma=174$ ) | 912 ± 51 ( $\sigma=348$ )  | 670 ± 27 ( $\sigma=182$ )  | 481 ± 62 ( $\sigma=424$ )  |
| ≥ 70 years  | 9       | 891 ± 31 ( $\sigma=92.6$ ) | 815 ± 100 ( $\sigma=307$ ) | 605 ± 19 ( $\sigma=55.8$ ) | 411 ± 130 ( $\sigma=394$ ) |
| $F_{7,628}$ |         | 6.98                       | 1.61                       | 0.527                      | 1.94                       |
| $p$         |         | $4.97 \cdot 10^{-8}$       | 0.129                      | 0.815                      | 0.0613                     |
| $R^2$       |         | 0.0722                     | 0.0176                     | 0.00584                    | 0.0211                     |
| $\delta$    |         | 1.59                       | 1.03                       | 0.419                      | 1.16                       |

Table 49: Observable dependence on minimum age in the  $0.15 \leq \rho \leq 0.2$  ped/m<sup>2</sup> density range. Lengths in millimetres, times in seconds.

| Minimum age | $N_g^k$ | $V$                         | $r$                        | $x$                         | $y$                        |
|-------------|---------|-----------------------------|----------------------------|-----------------------------|----------------------------|
| 0-9 years   | 6       | 1284 ± 110 ( $\sigma=258$ ) | 693 ± 51 ( $\sigma=126$ )  | 485 ± 47 ( $\sigma=116$ )   | 401 ± 92 ( $\sigma=225$ )  |
| 10-19 years | 14      | 1146 ± 47 ( $\sigma=176$ )  | 806 ± 65 ( $\sigma=244$ )  | 571 ± 39 ( $\sigma=147$ )   | 426 ± 91 ( $\sigma=341$ )  |
| 20-29 years | 72      | 1099 ± 16 ( $\sigma=133$ )  | 745 ± 20 ( $\sigma=167$ )  | 598 ± 17 ( $\sigma=145$ )   | 322 ± 30 ( $\sigma=255$ )  |
| 30-39 years | 39      | 1102 ± 31 ( $\sigma=192$ )  | 766 ± 33 ( $\sigma=208$ )  | 575 ± 24 ( $\sigma=149$ )   | 372 ± 50 ( $\sigma=313$ )  |
| 40-49 years | 17      | 1121 ± 32 ( $\sigma=131$ )  | 763 ± 37 ( $\sigma=152$ )  | 547 ± 42 ( $\sigma=172$ )   | 403 ± 68 ( $\sigma=279$ )  |
| 50-59 years | 10      | 1057 ± 53 ( $\sigma=167$ )  | 739 ± 60 ( $\sigma=190$ )  | 485 ± 58 ( $\sigma=184$ )   | 416 ± 110 ( $\sigma=343$ ) |
| 60-69 years | 7       | 1021 ± 75 ( $\sigma=199$ )  | 967 ± 130 ( $\sigma=354$ ) | 616 ± 84 ( $\sigma=222$ )   | 618 ± 160 ( $\sigma=423$ ) |
| ≥ 70 years  | 2       | 760 ± 18 ( $\sigma=25.4$ )  | 644 ± 22 ( $\sigma=31$ )   | 585 ± 8.9 ( $\sigma=12.5$ ) | 185 ± 52 ( $\sigma=73.5$ ) |
| $F_{7,159}$ |         | 2.76                        | 1.46                       | 1.11                        | 1.21                       |
| $p$         |         | 0.00993                     | 0.184                      | 0.359                       | 0.299                      |
| $R^2$       |         | 0.108                       | 0.0606                     | 0.0466                      | 0.0506                     |
| $\delta$    |         | 2.22                        | 0.987                      | 0.652                       | 1.1                        |

Tables 50 and 51 show, respectively, the minimum age  $p$  and  $\delta$  values in different density ranges

Table 50: Minimum age  $p$  values in different density ranges.

| Density                     | $V$                  | $r$     | $x$     | $y$                  |
|-----------------------------|----------------------|---------|---------|----------------------|
| 0-0.05 ped/m <sup>2</sup>   | $4.97 \cdot 10^{-8}$ | 0.129   | 0.815   | 0.0613               |
| 0.05-0.1 ped/m <sup>2</sup> | $< 10^{-8}$          | 0.00286 | 0.0232  | $1.26 \cdot 10^{-6}$ |
| 0.1-0.15 ped/m <sup>2</sup> | $8.51 \cdot 10^{-8}$ | 0.0207  | 0.00346 | $7.22 \cdot 10^{-6}$ |
| 0.15-0.2 ped/m <sup>2</sup> | 0.00993              | 0.184   | 0.359   | 0.299                |
| 0.2-0.25 ped/m <sup>2</sup> | 0.651                | 0.504   | 0.118   | 0.328                |

Table 51: Minimum age  $\delta$  values in different density ranges.

| Density                     | $V$   | $r$   | $x$   | $y$   |
|-----------------------------|-------|-------|-------|-------|
| 0-0.05 ped/m <sup>2</sup>   | 1.59  | 1.03  | 0.419 | 1.16  |
| 0.05-0.1 ped/m <sup>2</sup> | 1.6   | 0.941 | 0.605 | 1.36  |
| 0.1-0.15 ped/m <sup>2</sup> | 2.25  | 0.689 | 0.93  | 0.924 |
| 0.15-0.2 ped/m <sup>2</sup> | 2.22  | 0.987 | 0.652 | 1.1   |
| 0.2-0.25 ped/m <sup>2</sup> | 0.513 | 2.14  | 1.15  | 1.14  |

## Relation

Tables 52, 53, 54 and 55 show the age dependence of observables in, respectively, colleagues, couples, families and friends. Observable values almost have no age dependence in the 20-59 years age (with the exclusion of friend velocity). It is interesting to note that the  $y$  distribution assumes a larger value for families even when only adults are involved. Another interesting, although expectable, result is that while dyads with teenagers are very abreast in the friends category, they are not abreast in the family one (the  $y$  values is almost doubled in families).

Table 52: Observable dependence on minimum age for colleagues. Lengths in millimetres, times in seconds.

| Minimum age | $N_g^k$ | $V$                            | $r$                             | $x$                            | $y$                            |
|-------------|---------|--------------------------------|---------------------------------|--------------------------------|--------------------------------|
| 20-29 years | 86      | $1255 \pm 18$ ( $\sigma=165$ ) | $813 \pm 20$ ( $\sigma=185$ )   | $706 \pm 16$ ( $\sigma=144$ )  | $291 \pm 24$ ( $\sigma=219$ )  |
| 30-39 years | 145     | $1293 \pm 14$ ( $\sigma=167$ ) | $861 \pm 21$ ( $\sigma=257$ )   | $734 \pm 14$ ( $\sigma=165$ )  | $331 \pm 25$ ( $\sigma=301$ )  |
| 40-49 years | 71      | $1258 \pm 14$ ( $\sigma=119$ ) | $870 \pm 28$ ( $\sigma=236$ )   | $714 \pm 19$ ( $\sigma=161$ )  | $363 \pm 38$ ( $\sigma=324$ )  |
| 50-59 years | 52      | $1274 \pm 22$ ( $\sigma=159$ ) | $844 \pm 24$ ( $\sigma=172$ )   | $700 \pm 20$ ( $\sigma=142$ )  | $350 \pm 36$ ( $\sigma=263$ )  |
| 60-69 years | 4       | $1217 \pm 36$ ( $\sigma=72$ )  | $1075 \pm 220$ ( $\sigma=433$ ) | $692 \pm 100$ ( $\sigma=208$ ) | $617 \pm 320$ ( $\sigma=632$ ) |
| $F_{4,353}$ |         | 1.17                           | 1.72                            | 0.702                          | 1.62                           |
| $p$         |         | 0.326                          | 0.146                           | 0.591                          | 0.168                          |
| $R^2$       |         | 0.013                          | 0.0191                          | 0.00789                        | 0.018                          |
| $\delta$    |         | 0.461                          | 1.32                            | 0.252                          | 1.33                           |

Table 53: Observable dependence on minimum age for couples. Lengths in millimetres, times in seconds.

| Minimum age | $N_g^k$ | $V$                         | $r$                        | $x$                        | $y$                        |
|-------------|---------|-----------------------------|----------------------------|----------------------------|----------------------------|
| 10-19 years | 2       | 958 ± 180 ( $\sigma=253$ )  | 919 ± 53 ( $\sigma=74.7$ ) | 725 ± 58 ( $\sigma=81.7$ ) | 480 ± 180 ( $\sigma=257$ ) |
| 20-29 years | 74      | 1115 ± 19 ( $\sigma=165$ )  | 711 ± 27 ( $\sigma=229$ )  | 600 ± 18 ( $\sigma=154$ )  | 281 ± 28 ( $\sigma=243$ )  |
| 30-39 years | 17      | 1049 ± 37 ( $\sigma=151$ )  | 670 ± 35 ( $\sigma=143$ )  | 572 ± 32 ( $\sigma=130$ )  | 274 ± 30 ( $\sigma=124$ )  |
| 40-49 years | 3       | 1091 ± 110 ( $\sigma=187$ ) | 897 ± 110 ( $\sigma=198$ ) | 684 ± 66 ( $\sigma=115$ )  | 501 ± 130 ( $\sigma=223$ ) |
| $F_{3,92}$  |         | 1.2                         | 1.53                       | 0.966                      | 1.36                       |
| $p$         |         | 0.315                       | 0.211                      | 0.412                      | 0.261                      |
| $R^2$       |         | 0.0376                      | 0.0476                     | 0.0306                     | 0.0424                     |
| $\delta$    |         | 0.946                       | 1.78                       | 1.19                       | 1.65                       |

Table 54: Observable dependence on minimum age for families. Lengths in millimetres, times in seconds.

| Minimum age | $N_g^k$ | $V$                        | $r$                        | $x$                        | $y$                        |
|-------------|---------|----------------------------|----------------------------|----------------------------|----------------------------|
| 0-9 years   | 31      | 1143 ± 42 ( $\sigma=235$ ) | 995 ± 69 ( $\sigma=383$ )  | 529 ± 34 ( $\sigma=189$ )  | 701 ± 87 ( $\sigma=485$ )  |
| 10-19 years | 36      | 1163 ± 38 ( $\sigma=230$ ) | 831 ± 49 ( $\sigma=296$ )  | 617 ± 30 ( $\sigma=179$ )  | 415 ± 58 ( $\sigma=347$ )  |
| 20-29 years | 23      | 1109 ± 39 ( $\sigma=187$ ) | 877 ± 58 ( $\sigma=277$ )  | 581 ± 37 ( $\sigma=177$ )  | 527 ± 78 ( $\sigma=373$ )  |
| 30-39 years | 46      | 1078 ± 23 ( $\sigma=159$ ) | 814 ± 33 ( $\sigma=225$ )  | 561 ± 24 ( $\sigma=163$ )  | 458 ± 49 ( $\sigma=330$ )  |
| 40-49 years | 41      | 1116 ± 31 ( $\sigma=199$ ) | 801 ± 28 ( $\sigma=181$ )  | 582 ± 23 ( $\sigma=149$ )  | 431 ± 40 ( $\sigma=256$ )  |
| 50-59 years | 28      | 1048 ± 32 ( $\sigma=169$ ) | 846 ± 55 ( $\sigma=289$ )  | 562 ± 34 ( $\sigma=182$ )  | 492 ± 78 ( $\sigma=410$ )  |
| 60-69 years | 37      | 1030 ± 24 ( $\sigma=145$ ) | 911 ± 63 ( $\sigma=382$ )  | 642 ± 25 ( $\sigma=154$ )  | 512 ± 75 ( $\sigma=456$ )  |
| ≥ 70 years  | 4       | 847 ± 52 ( $\sigma=104$ )  | 926 ± 190 ( $\sigma=384$ ) | 550 ± 38 ( $\sigma=75.6$ ) | 575 ± 240 ( $\sigma=477$ ) |
| $F_{7,238}$ |         | 2.83                       | 1.52                       | 1.46                       | 1.74                       |
| $p$         |         | 0.00758                    | 0.162                      | 0.182                      | 0.101                      |
| $R^2$       |         | 0.0767                     | 0.0427                     | 0.0412                     | 0.0486                     |
| $\delta$    |         | 1.42                       | 0.679                      | 0.659                      | 0.686                      |

Table 55: Observable dependence on minimum age for friends. Lengths in millimetres, times in seconds.

| Minimum age | $N_g^k$ | $V$                        | $r$                        | $x$                        | $y$                        |
|-------------|---------|----------------------------|----------------------------|----------------------------|----------------------------|
| 10-19 years | 23      | 1143 ± 61 ( $\sigma=292$ ) | 681 ± 15 ( $\sigma=73.9$ ) | 621 ± 16 ( $\sigma=78.5$ ) | 217 ± 19 ( $\sigma=93.2$ ) |
| 20-29 years | 164     | 1186 ± 13 ( $\sigma=164$ ) | 801 ± 16 ( $\sigma=208$ )  | 683 ± 10 ( $\sigma=128$ )  | 298 ± 21 ( $\sigma=265$ )  |
| 30-39 years | 56      | 1143 ± 28 ( $\sigma=206$ ) | 817 ± 24 ( $\sigma=178$ )  | 644 ± 22 ( $\sigma=162$ )  | 366 ± 38 ( $\sigma=286$ )  |
| 40-49 years | 19      | 1089 ± 47 ( $\sigma=206$ ) | 819 ± 49 ( $\sigma=213$ )  | 682 ± 21 ( $\sigma=92.3$ ) | 341 ± 68 ( $\sigma=295$ )  |
| 50-59 years | 22      | 1051 ± 36 ( $\sigma=167$ ) | 759 ± 44 ( $\sigma=208$ )  | 637 ± 24 ( $\sigma=115$ )  | 308 ± 59 ( $\sigma=276$ )  |
| 60-69 years | 26      | 996 ± 38 ( $\sigma=192$ )  | 808 ± 40 ( $\sigma=202$ )  | 625 ± 33 ( $\sigma=169$ )  | 383 ± 59 ( $\sigma=299$ )  |
| ≥ 70 years  | 8       | 906 ± 32 ( $\sigma=91.4$ ) | 716 ± 56 ( $\sigma=159$ )  | 606 ± 18 ( $\sigma=52.2$ ) | 290 ± 85 ( $\sigma=239$ )  |
| $F_{6,311}$ |         | 7.17                       | 1.82                       | 1.98                       | 1.29                       |
| $p$         |         | $3.58 \cdot 10^{-7}$       | 0.0947                     | 0.0678                     | 0.262                      |
| $R^2$       |         | 0.121                      | 0.0339                     | 0.0368                     | 0.0242                     |
| $\delta$    |         | 1.73                       | 0.904                      | 0.608                      | 0.731                      |

## Gender

Tables 56, 57 and 58 show the age dependence of observables in, respectively, dyads with two females, mixed dyads and two males. The results are similar to those shown in the

main text. Although based on an extremely reduced number of data, it is interesting to note the large difference in velocity between two males and two females dyads with children (mixed dyads show a value in between, probably due to the fact that they include male and female parents), and the very large  $y$  (non-abreast formation) value assumed in two females dyads (mixed dyads on the opposite are more abreast). This values are based on very few groups, but differences are nevertheless larger than standard errors, and could reflect differences in the relation that children have with fathers and mothers (at least in the observed cultural environment).

Table 56: Observable dependence on minimum age for two females dyads. Lengths in millimetres, times in seconds.

| Minimum age | $N_g^k$ | $V$                        | $r$                         | $x$                       | $y$                        |
|-------------|---------|----------------------------|-----------------------------|---------------------------|----------------------------|
| 0-9 years   | 6       | 985 ± 88 ( $\sigma=215$ )  | 1252 ± 150 ( $\sigma=378$ ) | 525 ± 78 ( $\sigma=192$ ) | 993 ± 220 ( $\sigma=535$ ) |
| 10-19 years | 20      | 1075 ± 58 ( $\sigma=258$ ) | 738 ± 48 ( $\sigma=216$ )   | 621 ± 23 ( $\sigma=103$ ) | 291 ± 64 ( $\sigma=288$ )  |
| 20-29 years | 110     | 1169 ± 16 ( $\sigma=167$ ) | 789 ± 21 ( $\sigma=221$ )   | 684 ± 10 ( $\sigma=107$ ) | 273 ± 26 ( $\sigma=277$ )  |
| 30-39 years | 55      | 1108 ± 25 ( $\sigma=188$ ) | 777 ± 23 ( $\sigma=171$ )   | 639 ± 16 ( $\sigma=118$ ) | 330 ± 33 ( $\sigma=246$ )  |
| 40-49 years | 24      | 1040 ± 33 ( $\sigma=163$ ) | 827 ± 54 ( $\sigma=266$ )   | 622 ± 25 ( $\sigma=123$ ) | 404 ± 77 ( $\sigma=379$ )  |
| 50-59 years | 17      | 1015 ± 35 ( $\sigma=143$ ) | 704 ± 24 ( $\sigma=97.3$ )  | 623 ± 29 ( $\sigma=120$ ) | 240 ± 32 ( $\sigma=133$ )  |
| 60-69 years | 17      | 923 ± 31 ( $\sigma=130$ )  | 791 ± 52 ( $\sigma=213$ )   | 580 ± 36 ( $\sigma=149$ ) | 390 ± 85 ( $\sigma=349$ )  |
| ≥ 70 years  | 3       | 958 ± 14 ( $\sigma=23.6$ ) | 629 ± 31 ( $\sigma=53.5$ )  | 587 ± 40 ( $\sigma=69$ )  | 186 ± 22 ( $\sigma=37.4$ ) |
| $F_{7,244}$ |         | 6.27                       | 4.83                        | 3.74                      | 5.64                       |
| $p$         |         | $8.87 \cdot 10^{-7}$       | $4.06 \cdot 10^{-5}$        | 0.000721                  | $4.77 \cdot 10^{-6}$       |
| $R^2$       |         | 0.153                      | 0.122                       | 0.0969                    | 0.139                      |
| $\delta$    |         | 1.51                       | 1.94                        | 1.42                      | 1.78                       |

Table 57: Observable dependence on minimum age for mixed dyads. Lengths in millimetres, times in seconds.

| Minimum age | $N_g^k$ | $V$                        | $r$                        | $x$                        | $y$                        |
|-------------|---------|----------------------------|----------------------------|----------------------------|----------------------------|
| 0-9 years   | 12      | 1119 ± 56 ( $\sigma=193$ ) | 888 ± 75 ( $\sigma=259$ )  | 573 ± 61 ( $\sigma=212$ )  | 547 ± 83 ( $\sigma=287$ )  |
| 10-19 years | 16      | 1060 ± 45 ( $\sigma=181$ ) | 840 ± 54 ( $\sigma=214$ )  | 620 ± 36 ( $\sigma=145$ )  | 417 ± 78 ( $\sigma=313$ )  |
| 20-29 years | 120     | 1123 ± 16 ( $\sigma=175$ ) | 782 ± 23 ( $\sigma=251$ )  | 619 ± 17 ( $\sigma=182$ )  | 352 ± 27 ( $\sigma=301$ )  |
| 30-39 years | 93      | 1143 ± 19 ( $\sigma=180$ ) | 834 ± 30 ( $\sigma=286$ )  | 601 ± 19 ( $\sigma=179$ )  | 435 ± 40 ( $\sigma=386$ )  |
| 40-49 years | 53      | 1141 ± 26 ( $\sigma=191$ ) | 802 ± 25 ( $\sigma=178$ )  | 614 ± 21 ( $\sigma=150$ )  | 400 ± 34 ( $\sigma=245$ )  |
| 50-59 years | 34      | 1078 ± 29 ( $\sigma=168$ ) | 848 ± 47 ( $\sigma=277$ )  | 604 ± 32 ( $\sigma=188$ )  | 455 ± 66 ( $\sigma=387$ )  |
| 60-69 years | 38      | 1042 ± 26 ( $\sigma=160$ ) | 905 ± 61 ( $\sigma=378$ )  | 642 ± 25 ( $\sigma=152$ )  | 506 ± 73 ( $\sigma=451$ )  |
| ≥ 70 years  | 5       | 831 ± 44 ( $\sigma=99$ )   | 868 ± 160 ( $\sigma=363$ ) | 563 ± 33 ( $\sigma=72.8$ ) | 484 ± 210 ( $\sigma=463$ ) |
| $F_{7,363}$ |         | 3.64                       | 1.11                       | 0.387                      | 1.32                       |
| $p$         |         | 0.000822                   | 0.358                      | 0.91                       | 0.24                       |
| $R^2$       |         | 0.0656                     | 0.0209                     | 0.0074                     | 0.0248                     |
| $\delta$    |         | 1.76                       | 0.431                      | 0.536                      | 0.652                      |

## Height

Tables 59 and 60 show the age dependence of observables in, respectively, the 150-160 cm and 170-180 cm minimum height ranges. These data, which respect the patterns

Table 58: Observable dependence on minimum age for two males dyads. Lengths in millimetres, times in seconds.

| Minimum age     | $N_g^k$ | $V$                            | $r$                            | $x$                            | $y$                            |
|-----------------|---------|--------------------------------|--------------------------------|--------------------------------|--------------------------------|
| 0-9 years       | 13      | 1237 $\pm$ 65 ( $\sigma=233$ ) | 975 $\pm$ 120 ( $\sigma=425$ ) | 491 $\pm$ 42 ( $\sigma=153$ )  | 709 $\pm$ 150 ( $\sigma=540$ ) |
| 10-19 years     | 27      | 1277 $\pm$ 48 ( $\sigma=252$ ) | 803 $\pm$ 58 ( $\sigma=303$ )  | 628 $\pm$ 34 ( $\sigma=175$ )  | 376 $\pm$ 65 ( $\sigma=337$ )  |
| 20-29 years     | 134     | 1241 $\pm$ 14 ( $\sigma=156$ ) | 806 $\pm$ 16 ( $\sigma=180$ )  | 697 $\pm$ 13 ( $\sigma=148$ )  | 296 $\pm$ 18 ( $\sigma=208$ )  |
| 30-39 years     | 144     | 1280 $\pm$ 16 ( $\sigma=190$ ) | 860 $\pm$ 18 ( $\sigma=222$ )  | 732 $\pm$ 14 ( $\sigma=173$ )  | 331 $\pm$ 22 ( $\sigma=259$ )  |
| 40-49 years     | 72      | 1257 $\pm$ 14 ( $\sigma=122$ ) | 875 $\pm$ 27 ( $\sigma=233$ )  | 715 $\pm$ 19 ( $\sigma=159$ )  | 365 $\pm$ 39 ( $\sigma=328$ )  |
| 50-59 years     | 60      | 1254 $\pm$ 22 ( $\sigma=168$ ) | 846 $\pm$ 25 ( $\sigma=193$ )  | 683 $\pm$ 19 ( $\sigma=144$ )  | 373 $\pm$ 38 ( $\sigma=297$ )  |
| 60-69 years     | 12      | 1134 $\pm$ 48 ( $\sigma=167$ ) | 930 $\pm$ 89 ( $\sigma=307$ )  | 711 $\pm$ 54 ( $\sigma=189$ )  | 462 $\pm$ 120 ( $\sigma=406$ ) |
| $\geq 70$ years | 4       | 902 $\pm$ 48 ( $\sigma=95.7$ ) | 802 $\pm$ 92 ( $\sigma=183$ )  | 619 $\pm$ 19 ( $\sigma=37.6$ ) | 410 $\pm$ 140 ( $\sigma=289$ ) |
| $F_{7,458}$     |         | 3.77                           | 1.82                           | 5.09                           | 4.07                           |
| $p$             |         | 0.000553                       | 0.081                          | $1.39 \cdot 10^{-5}$           | 0.000239                       |
| $R^2$           |         | 0.0544                         | 0.0271                         | 0.0722                         | 0.0586                         |
| $\delta$        |         | 2.01                           | 0.445                          | 1.41                           | 1.64                           |

highlighted in the main text, present a sufficient number of groups in each category and are thus reliable. In some situation, a noisy tracking of a child may cause to have a category with very poor and not reliable representation (e.g. groups with children but with a tall minimum height) causing some irregular behaviour in the  $p$  and  $\delta$  values of tables 61 and 62.

Table 59: Observable dependence on minimum age in the 150-160 cm minimum height range. Lengths in millimetres, times in seconds.

| Minimum age     | $N_g^k$ | $V$                            | $r$                           | $x$                            | $y$                           |
|-----------------|---------|--------------------------------|-------------------------------|--------------------------------|-------------------------------|
| 10-19 years     | 21      | 1124 $\pm$ 54 ( $\sigma=246$ ) | 783 $\pm$ 47 ( $\sigma=215$ ) | 606 $\pm$ 31 ( $\sigma=143$ )  | 352 $\pm$ 73 ( $\sigma=333$ ) |
| 20-29 years     | 75      | 1157 $\pm$ 21 ( $\sigma=184$ ) | 800 $\pm$ 27 ( $\sigma=232$ ) | 668 $\pm$ 14 ( $\sigma=122$ )  | 311 $\pm$ 35 ( $\sigma=307$ ) |
| 30-39 years     | 48      | 1109 $\pm$ 24 ( $\sigma=168$ ) | 804 $\pm$ 32 ( $\sigma=223$ ) | 624 $\pm$ 20 ( $\sigma=139$ )  | 392 $\pm$ 44 ( $\sigma=305$ ) |
| 40-49 years     | 32      | 1108 $\pm$ 39 ( $\sigma=218$ ) | 828 $\pm$ 37 ( $\sigma=211$ ) | 589 $\pm$ 27 ( $\sigma=151$ )  | 452 $\pm$ 58 ( $\sigma=328$ ) |
| 50-59 years     | 19      | 1067 $\pm$ 39 ( $\sigma=171$ ) | 757 $\pm$ 34 ( $\sigma=146$ ) | 611 $\pm$ 36 ( $\sigma=156$ )  | 334 $\pm$ 52 ( $\sigma=228$ ) |
| 60-69 years     | 33      | 1008 $\pm$ 28 ( $\sigma=163$ ) | 808 $\pm$ 65 ( $\sigma=375$ ) | 641 $\pm$ 20 ( $\sigma=112$ )  | 365 $\pm$ 75 ( $\sigma=429$ ) |
| $\geq 70$ years | 5       | 883 $\pm$ 52 ( $\sigma=117$ )  | 666 $\pm$ 48 ( $\sigma=108$ ) | 538 $\pm$ 30 ( $\sigma=67.2$ ) | 272 $\pm$ 88 ( $\sigma=197$ ) |
| $F_{6,226}$     |         | 3.65                           | 0.427                         | 2.13                           | 0.849                         |
| $p$             |         | 0.00177                        | 0.86                          | 0.0506                         | 0.533                         |
| $R^2$           |         | 0.0883                         | 0.0112                        | 0.0536                         | 0.022                         |
| $\delta$        |         | 1.52                           | 0.802                         | 1.09                           | 0.569                         |

Table 60: Observable dependence on minimum age in the 170-180 cm minimum height range. Lengths in millimetres, times in seconds.

| Minimum age | $N_g^k$ | $V$                            | $r$                           | $x$                           | $y$                           |
|-------------|---------|--------------------------------|-------------------------------|-------------------------------|-------------------------------|
| 20-29 years | 95      | 1209 $\pm$ 16 ( $\sigma=152$ ) | 808 $\pm$ 18 ( $\sigma=173$ ) | 688 $\pm$ 16 ( $\sigma=156$ ) | 309 $\pm$ 22 ( $\sigma=219$ ) |
| 30-39 years | 90      | 1269 $\pm$ 21 ( $\sigma=203$ ) | 838 $\pm$ 24 ( $\sigma=225$ ) | 729 $\pm$ 16 ( $\sigma=155$ ) | 300 $\pm$ 26 ( $\sigma=246$ ) |
| 40-49 years | 45      | 1265 $\pm$ 18 ( $\sigma=120$ ) | 820 $\pm$ 20 ( $\sigma=137$ ) | 720 $\pm$ 20 ( $\sigma=131$ ) | 298 $\pm$ 26 ( $\sigma=176$ ) |
| 50-59 years | 30      | 1241 $\pm$ 33 ( $\sigma=182$ ) | 862 $\pm$ 44 ( $\sigma=238$ ) | 635 $\pm$ 27 ( $\sigma=148$ ) | 436 $\pm$ 68 ( $\sigma=371$ ) |
| $F_{3,256}$ |         | 2.21                           | 0.709                         | 3.36                          | 2.61                          |
| $p$         |         | 0.0873                         | 0.548                         | 0.0194                        | 0.0517                        |
| $R^2$       |         | 0.0253                         | 0.00823                       | 0.0379                        | 0.0297                        |
| $\delta$    |         | 0.339                          | 0.282                         | 0.613                         | 0.51                          |

Table 61: Minimum age  $p$  values in different minimum height ranges.

| Minimum height | $V$      | $r$     | $x$    | $y$     |
|----------------|----------|---------|--------|---------|
| < 140 cm       | 0.0333   | 0.137   | 0.0326 | 0.0184  |
| 140-150 cm     | 0.0129   | 0.65    | 0.858  | 0.615   |
| 150-160 cm     | 0.00177  | 0.86    | 0.0506 | 0.533   |
| 160-170 cm     | 0.000643 | 0.00561 | 0.807  | 0.00456 |
| 170-180 cm     | 0.0873   | 0.548   | 0.0194 | 0.0517  |
| > 180 cm       | 0.98     | 0.292   | 0.56   | 0.0386  |

Table 62: Minimum age  $\delta$  values in different minimum height ranges.

| Minimum height | $V$   | $r$   | $x$   | $y$   |
|----------------|-------|-------|-------|-------|
| < 140 cm       | 0.829 | 0.566 | 0.83  | 0.919 |
| 140-150 cm     | 7.42  | 1.27  | 0.946 | 1.69  |
| 150-160 cm     | 1.52  | 0.802 | 1.09  | 0.569 |
| 160-170 cm     | 1.83  | 1.09  | 0.926 | 0.818 |
| 170-180 cm     | 0.339 | 0.282 | 0.613 | 0.51  |
| > 180 cm       | 0.181 | 1.2   | 1.53  | 1.26  |

## Secondary effects and height

### Density

Tables 63 and 64 show the dependence of observables on minimum height in the  $0 \leq \rho \leq 0.05$  and  $0.15 \leq \rho \leq 0.2$  ped/m<sup>2</sup> ranges, respectively. The trends discussed in the main text are still present. We notice again a tendency of short people (most probably children) to walk faster at higher density.  $p$  and  $\delta$  values for minimum height at different densities are shown in tables 65 and 66.

Table 63: Observable dependence on minimum height for dyads in the  $0 \leq \rho \leq 0.05$  ped/m<sup>2</sup> range. Lengths in millimetres, times in seconds.

| Minimum height | $N_g^k$ | $V$                        | $r$                        | $x$                       | $y$                        |
|----------------|---------|----------------------------|----------------------------|---------------------------|----------------------------|
| < 140 cm       | 21      | 1138 ± 63 ( $\sigma=288$ ) | 1034 ± 80 ( $\sigma=368$ ) | 693 ± 44 ( $\sigma=201$ ) | 616 ± 92 ( $\sigma=421$ )  |
| 140-150 cm     | 29      | 1067 ± 57 ( $\sigma=304$ ) | 876 ± 51 ( $\sigma=275$ )  | 671 ± 40 ( $\sigma=218$ ) | 420 ± 64 ( $\sigma=346$ )  |
| 150-160 cm     | 148     | 1104 ± 18 ( $\sigma=224$ ) | 837 ± 25 ( $\sigma=304$ )  | 648 ± 11 ( $\sigma=128$ ) | 395 ± 32 ( $\sigma=390$ )  |
| 160-170 cm     | 290     | 1162 ± 11 ( $\sigma=187$ ) | 880 ± 19 ( $\sigma=318$ )  | 688 ± 13 ( $\sigma=217$ ) | 409 ± 22 ( $\sigma=379$ )  |
| 170-180 cm     | 141     | 1259 ± 16 ( $\sigma=188$ ) | 878 ± 21 ( $\sigma=253$ )  | 718 ± 17 ( $\sigma=198$ ) | 364 ± 28 ( $\sigma=331$ )  |
| > 180 cm       | 7       | 1242 ± 69 ( $\sigma=182$ ) | 929 ± 73 ( $\sigma=194$ )  | 793 ± 45 ( $\sigma=120$ ) | 316 ± 100 ( $\sigma=270$ ) |
| $F_{5,630}$    |         | 9.97                       | 1.72                       | 2.32                      | 1.8                        |
| $p$            |         | $< 10^{-8}$                | 0.128                      | 0.0422                    | 0.11                       |
| $R^2$          |         | 0.0733                     | 0.0135                     | 0.0181                    | 0.0141                     |
| $\delta$       |         | 0.906                      | 0.634                      | 1.13                      | 0.767                      |

Table 64: Observable dependence on minimum height for dyads in the  $0.15 \leq \rho \leq 0.2$  ped/m<sup>2</sup> range. Lengths in millimetres, times in seconds.

| Minimum height | $N_g^k$ | $V$                         | $r$                        | $x$                       | $y$                        |
|----------------|---------|-----------------------------|----------------------------|---------------------------|----------------------------|
| < 140 cm       | 8       | 1185 ± 57 ( $\sigma=162$ )  | 872 ± 150 ( $\sigma=416$ ) | 512 ± 68 ( $\sigma=193$ ) | 555 ± 190 ( $\sigma=543$ ) |
| 140-150 cm     | 6       | 1166 ± 130 ( $\sigma=315$ ) | 965 ± 170 ( $\sigma=409$ ) | 604 ± 73 ( $\sigma=179$ ) | 590 ± 190 ( $\sigma=457$ ) |
| 150-160 cm     | 39      | 1068 ± 23 ( $\sigma=146$ )  | 754 ± 28 ( $\sigma=177$ )  | 518 ± 27 ( $\sigma=169$ ) | 408 ± 52 ( $\sigma=327$ )  |
| 160-170 cm     | 72      | 1093 ± 20 ( $\sigma=170$ )  | 722 ± 16 ( $\sigma=136$ )  | 586 ± 14 ( $\sigma=121$ ) | 321 ± 24 ( $\sigma=203$ )  |
| 170-180 cm     | 42      | 1127 ± 24 ( $\sigma=158$ )  | 792 ± 26 ( $\sigma=170$ )  | 618 ± 26 ( $\sigma=171$ ) | 352 ± 44 ( $\sigma=284$ )  |
| $F_{4,162}$    |         | 1.34                        | 3.29                       | 2.62                      | 2.31                       |
| $p$            |         | 0.259                       | 0.0127                     | 0.0368                    | 0.0597                     |
| $R^2$          |         | 0.0319                      | 0.0751                     | 0.0608                    | 0.054                      |
| $\delta$       |         | 0.787                       | 1.44                       | 0.606                     | 1.18                       |

### Relation

Tables 67, 68, 69 and 70 show the dependence of observables on minimum height for colleagues, couples, families and friends, respectively. The dependence of observables on height appears to be attenuated when analysed for groups with a fixed relation (and in particular for couples), as shown by the higher  $p$  values, and, to a lesser extent, lower  $\delta$  values.

Table 65:  $p$  values for minimum height in different density ranges.

| Density                     | $V$                  | $r$         | $x$                  | $y$                  |
|-----------------------------|----------------------|-------------|----------------------|----------------------|
| 0-0.05 ped/m <sup>2</sup>   | $< 10^{-8}$          | 0.128       | 0.0422               | 0.11                 |
| 0.05-0.1 ped/m <sup>2</sup> | $< 10^{-8}$          | 0.000607    | 0.000112             | $4.09 \cdot 10^{-6}$ |
| 0.1-0.15 ped/m <sup>2</sup> | $1.84 \cdot 10^{-5}$ | $< 10^{-8}$ | $3.34 \cdot 10^{-5}$ | $< 10^{-8}$          |
| 0.15-0.2 ped/m <sup>2</sup> | 0.259                | 0.0127      | 0.0368               | 0.0597               |
| 0.2-0.25 ped/m <sup>2</sup> | 0.303                | 0.602       | 0.603                | 0.765                |

Table 66:  $\delta$  values for minimum height in different density ranges.

| Density                     | $V$   | $r$   | $x$   | $y$   |
|-----------------------------|-------|-------|-------|-------|
| 0-0.05 ped/m <sup>2</sup>   | 0.906 | 0.634 | 1.13  | 0.767 |
| 0.05-0.1 ped/m <sup>2</sup> | 1.17  | 0.664 | 0.63  | 0.973 |
| 0.1-0.15 ped/m <sup>2</sup> | 0.856 | 1.32  | 1.12  | 1.29  |
| 0.15-0.2 ped/m <sup>2</sup> | 0.787 | 1.44  | 0.606 | 1.18  |
| 0.2-0.25 ped/m <sup>2</sup> | 0.886 | 0.578 | 0.54  | 0.422 |

Table 67: Observable dependence on minimum height for colleague dyads. Lengths in millimetres, times in seconds.

| Minimum height | $N_g^k$ | $V$                            | $r$                            | $x$                            | $y$                           |
|----------------|---------|--------------------------------|--------------------------------|--------------------------------|-------------------------------|
| 150-160 cm     | 15      | $1135 \pm 36$ ( $\sigma=141$ ) | $732 \pm 25$ ( $\sigma=98.2$ ) | $652 \pm 22$ ( $\sigma=85.9$ ) | $265 \pm 31$ ( $\sigma=120$ ) |
| 160-170 cm     | 159     | $1276 \pm 12$ ( $\sigma=157$ ) | $874 \pm 21$ ( $\sigma=265$ )  | $712 \pm 13$ ( $\sigma=168$ )  | $369 \pm 28$ ( $\sigma=351$ ) |
| 170-180 cm     | 170     | $1288 \pm 12$ ( $\sigma=155$ ) | $846 \pm 15$ ( $\sigma=202$ )  | $731 \pm 12$ ( $\sigma=153$ )  | $312 \pm 18$ ( $\sigma=236$ ) |
| > 180 cm       | 13      | $1220 \pm 36$ ( $\sigma=128$ ) | $789 \pm 59$ ( $\sigma=214$ )  | $689 \pm 33$ ( $\sigma=120$ )  | $263 \pm 67$ ( $\sigma=241$ ) |
| $F_{3,353}$    |         | 5.03                           | 2.2                            | 1.49                           | 1.63                          |
| $p$            |         | 0.002                          | 0.0881                         | 0.217                          | 0.182                         |
| $R^2$          |         | 0.041                          | 0.0183                         | 0.0125                         | 0.0137                        |
| $\delta$       |         | 0.996                          | 0.556                          | 0.53                           | 0.307                         |

Table 68: Observable dependence on minimum height for couples. Lengths in millimetres, times in seconds.

| Minimum height | $N_g^k$ | $V$                            | $r$                           | $x$                            | $y$                           |
|----------------|---------|--------------------------------|-------------------------------|--------------------------------|-------------------------------|
| 150-160 cm     | 20      | $1060 \pm 43$ ( $\sigma=193$ ) | $736 \pm 32$ ( $\sigma=143$ ) | $631 \pm 25$ ( $\sigma=111$ )  | $288 \pm 39$ ( $\sigma=175$ ) |
| 160-170 cm     | 60      | $1114 \pm 21$ ( $\sigma=160$ ) | $716 \pm 33$ ( $\sigma=254$ ) | $591 \pm 22$ ( $\sigma=171$ )  | $305 \pm 34$ ( $\sigma=261$ ) |
| 170-180 cm     | 15      | $1092 \pm 42$ ( $\sigma=162$ ) | $678 \pm 35$ ( $\sigma=137$ ) | $592 \pm 24$ ( $\sigma=93.1$ ) | $245 \pm 39$ ( $\sigma=151$ ) |
| $F_{2,92}$     |         | 0.773                          | 0.296                         | 0.528                          | 0.408                         |
| $p$            |         | 0.464                          | 0.745                         | 0.591                          | 0.666                         |
| $R^2$          |         | 0.0165                         | 0.00639                       | 0.0114                         | 0.00878                       |
| $\delta$       |         | 0.321                          | 0.414                         | 0.249                          | 0.249                         |

## Gender

Tables 71, 72 and 73 show the dependence of observables on minimum height for two females, mixed and two males dyads, respectively. As discussed in the main text and



Table 69: Observable dependence on minimum height for families. Lengths in millimetres, times in seconds.

| Minimum height | $N_g^k$ | $V$                        | $r$                        | $x$                       | $y$                       |
|----------------|---------|----------------------------|----------------------------|---------------------------|---------------------------|
| < 140 cm       | 33      | 1117 ± 38 ( $\sigma=216$ ) | 1062 ± 72 ( $\sigma=411$ ) | 570 ± 39 ( $\sigma=222$ ) | 746 ± 89 ( $\sigma=509$ ) |
| 140-150 cm     | 19      | 1122 ± 62 ( $\sigma=270$ ) | 832 ± 60 ( $\sigma=262$ )  | 636 ± 32 ( $\sigma=139$ ) | 410 ± 65 ( $\sigma=285$ ) |
| 150-160 cm     | 77      | 1107 ± 23 ( $\sigma=204$ ) | 835 ± 34 ( $\sigma=302$ )  | 583 ± 19 ( $\sigma=163$ ) | 466 ± 44 ( $\sigma=387$ ) |
| 160-170 cm     | 99      | 1080 ± 17 ( $\sigma=170$ ) | 831 ± 24 ( $\sigma=241$ )  | 580 ± 17 ( $\sigma=166$ ) | 467 ± 33 ( $\sigma=332$ ) |
| 170-180 cm     | 17      | 1053 ± 36 ( $\sigma=149$ ) | 833 ± 65 ( $\sigma=268$ )  | 566 ± 37 ( $\sigma=153$ ) | 458 ± 98 ( $\sigma=403$ ) |
| $F_{4,240}$    |         | 0.602                      | 4.3                        | 0.542                     | 4.04                      |
| $p$            |         | 0.661                      | 0.00224                    | 0.705                     | 0.00344                   |
| $R^2$          |         | 0.00993                    | 0.0668                     | 0.00896                   | 0.0631                    |
| $\delta$       |         | 0.312                      | 0.788                      | 0.478                     | 0.76                      |

Table 70: Observable dependence on minimum height for friends. Lengths in millimetres, times in seconds.

| Minimum height | $N_g^k$ | $V$                         | $r$                        | $x$                        | $y$                       |
|----------------|---------|-----------------------------|----------------------------|----------------------------|---------------------------|
| < 140 cm       | 4       | 1129 ± 55 ( $\sigma=109$ )  | 611 ± 20 ( $\sigma=39.7$ ) | 518 ± 31 ( $\sigma=61.8$ ) | 246 ± 68 ( $\sigma=136$ ) |
| 140-150 cm     | 16      | 1115 ± 88 ( $\sigma=354$ )  | 816 ± 44 ( $\sigma=175$ )  | 628 ± 43 ( $\sigma=172$ )  | 382 ± 80 ( $\sigma=319$ ) |
| 150-160 cm     | 101     | 1100 ± 20 ( $\sigma=202$ )  | 770 ± 21 ( $\sigma=209$ )  | 659 ± 10 ( $\sigma=104$ )  | 287 ± 27 ( $\sigma=269$ ) |
| 160-170 cm     | 142     | 1138 ± 15 ( $\sigma=174$ )  | 802 ± 18 ( $\sigma=211$ )  | 665 ± 12 ( $\sigma=146$ )  | 324 ± 23 ( $\sigma=276$ ) |
| 170-180 cm     | 53      | 1199 ± 23 ( $\sigma=168$ )  | 806 ± 19 ( $\sigma=138$ )  | 673 ± 18 ( $\sigma=132$ )  | 323 ± 32 ( $\sigma=233$ ) |
| > 180 cm       | 2       | 1606 ± 23 ( $\sigma=32.1$ ) | 928 ± 61 ( $\sigma=86.6$ ) | 805 ± 120 ( $\sigma=171$ ) | 329 ± 72 ( $\sigma=102$ ) |
| $F_{5,312}$    |         | 4.13                        | 1.27                       | 1.68                       | 0.515                     |
| $p$            |         | 0.0012                      | 0.276                      | 0.138                      | 0.765                     |
| $R^2$          |         | 0.0621                      | 0.02                       | 0.0263                     | 0.00819                   |
| $\delta$       |         | 2.52                        | 5.74                       | 2.83                       | 0.461                     |

shown in the supplementary figure S8, there is a loss of linearity in  $x$ , but the patterns described in the main text are still present, although partially attenuated, when gender is kept fixed.

Table 71: Observable dependence on minimum height for 2 female dyads. Lengths in millimetres, times in seconds.

| Minimum height | $N_g^k$ | $V$                        | $r$                         | $x$                        | $y$                        |
|----------------|---------|----------------------------|-----------------------------|----------------------------|----------------------------|
| < 140 cm       | 7       | 956 ± 74 ( $\sigma=195$ )  | 1186 ± 150 ( $\sigma=385$ ) | 529 ± 68 ( $\sigma=180$ )  | 935 ± 190 ( $\sigma=509$ ) |
| 140-150 cm     | 21      | 1022 ± 57 ( $\sigma=262$ ) | 841 ± 66 ( $\sigma=300$ )   | 591 ± 36 ( $\sigma=166$ )  | 439 ± 96 ( $\sigma=442$ )  |
| 150-160 cm     | 114     | 1098 ± 18 ( $\sigma=197$ ) | 780 ± 20 ( $\sigma=214$ )   | 656 ± 11 ( $\sigma=112$ )  | 306 ± 26 ( $\sigma=279$ )  |
| 160-170 cm     | 104     | 1131 ± 16 ( $\sigma=159$ ) | 768 ± 18 ( $\sigma=185$ )   | 658 ± 11 ( $\sigma=115$ )  | 278 ± 24 ( $\sigma=245$ )  |
| 170-180 cm     | 6       | 1123 ± 77 ( $\sigma=188$ ) | 706 ± 34 ( $\sigma=83.3$ )  | 644 ± 26 ( $\sigma=64.8$ ) | 213 ± 59 ( $\sigma=144$ )  |
| $F_{4,247}$    |         | 2.58                       | 6.59                        | 3.11                       | 9.37                       |
| $p$            |         | 0.0381                     | $4.66 \cdot 10^{-5}$        | 0.0159                     | $4.55 \cdot 10^{-7}$       |
| $R^2$          |         | 0.0401                     | 0.0965                      | 0.048                      | 0.132                      |
| $\delta$       |         | 1.08                       | 1.66                        | 1.08                       | 1.86                       |

Table 72: Observable dependence on minimum height for mixed gender dyads. Lengths in millimetres, times in seconds.

| Minimum height | $N_g^k$ | $V$                        | $r$                         | $x$                        | $y$                        |
|----------------|---------|----------------------------|-----------------------------|----------------------------|----------------------------|
| < 140 cm       | 14      | 1100 ± 42 ( $\sigma=159$ ) | 947 ± 82 ( $\sigma=307$ )   | 590 ± 53 ( $\sigma=199$ )  | 593 ± 100 ( $\sigma=373$ ) |
| 140-150 cm     | 9       | 1107 ± 66 ( $\sigma=199$ ) | 967 ± 91 ( $\sigma=273$ )   | 664 ± 42 ( $\sigma=127$ )  | 552 ± 120 ( $\sigma=346$ ) |
| 150-160 cm     | 99      | 1092 ± 20 ( $\sigma=195$ ) | 829 ± 29 ( $\sigma=286$ )   | 609 ± 16 ( $\sigma=160$ )  | 429 ± 38 ( $\sigma=376$ )  |
| 160-170 cm     | 210     | 1128 ± 12 ( $\sigma=176$ ) | 811 ± 18 ( $\sigma=262$ )   | 618 ± 13 ( $\sigma=184$ )  | 395 ± 23 ( $\sigma=328$ )  |
| 170-180 cm     | 37      | 1083 ± 28 ( $\sigma=172$ ) | 806 ± 44 ( $\sigma=267$ )   | 589 ± 24 ( $\sigma=143$ )  | 404 ± 61 ( $\sigma=372$ )  |
| > 180 cm       | 2       | 937 ± 140 ( $\sigma=204$ ) | 687 ± 3.2 ( $\sigma=4.56$ ) | 573 ± 48 ( $\sigma=67.8$ ) | 253 ± 55 ( $\sigma=77.2$ ) |
| $F_{5,365}$    |         | 1.14                       | 1.3                         | 0.418                      | 1.27                       |
| $p$            |         | 0.34                       | 0.262                       | 0.836                      | 0.277                      |
| $R^2$          |         | 0.0153                     | 0.0175                      | 0.00569                    | 0.0171                     |
| $\delta$       |         | 1.08                       | 1.09                        | 0.751                      | 0.945                      |

Table 73: Observable dependence on minimum height for male dyads. Lengths in millimetres, times in seconds.

| Minimum height | $N_g^k$ | $V$                         | $r$                        | $x$                       | $y$                        |
|----------------|---------|-----------------------------|----------------------------|---------------------------|----------------------------|
| < 140 cm       | 18      | 1221 ± 48 ( $\sigma=203$ )  | 977 ± 110 ( $\sigma=455$ ) | 577 ± 53 ( $\sigma=226$ ) | 631 ± 130 ( $\sigma=549$ ) |
| 140-150 cm     | 9       | 1301 ± 140 ( $\sigma=405$ ) | 861 ± 85 ( $\sigma=255$ )  | 640 ± 47 ( $\sigma=142$ ) | 456 ± 110 ( $\sigma=343$ ) |
| 150-160 cm     | 21      | 1196 ± 39 ( $\sigma=180$ )  | 739 ± 36 ( $\sigma=164$ )  | 600 ± 22 ( $\sigma=103$ ) | 320 ± 57 ( $\sigma=261$ )  |
| 160-170 cm     | 184     | 1238 ± 13 ( $\sigma=179$ )  | 863 ± 18 ( $\sigma=241$ )  | 700 ± 13 ( $\sigma=174$ ) | 372 ± 23 ( $\sigma=315$ )  |
| 170-180 cm     | 219     | 1272 ± 11 ( $\sigma=156$ )  | 834 ± 12 ( $\sigma=184$ )  | 719 ± 10 ( $\sigma=151$ ) | 310 ± 15 ( $\sigma=224$ )  |
| > 180 cm       | 15      | 1271 ± 46 ( $\sigma=178$ )  | 808 ± 53 ( $\sigma=207$ )  | 705 ± 35 ( $\sigma=134$ ) | 272 ± 59 ( $\sigma=229$ )  |
| $F_{5,460}$    |         | 1.46                        | 2.56                       | 4.51                      | 5.03                       |
| $p$            |         | 0.202                       | 0.0267                     | 0.000499                  | 0.00017                    |
| $R^2$          |         | 0.0156                      | 0.0271                     | 0.0468                    | 0.0518                     |
| $\delta$       |         | 0.394                       | 0.721                      | 0.903                     | 0.826                      |

## Age

Tables 74 and 75 show the dependence on minimum height of all observables for dyads with minimum age in the 20-29 and 50-59 year ranges, respectively, showing the effect of removing children from the population. Finally, tables 76 and 77 show the dependence of, respectively, minimum height  $p$  and  $\delta$  values on minimum age ranges.

Table 74: Observable dependence on minimum height for dyads with minimum age in the 20-29 year range. Lengths in millimetres, times in seconds.

| Minimum height | $N_g^k$ | $V$                         | $r$                        | $x$                         | $y$                        |
|----------------|---------|-----------------------------|----------------------------|-----------------------------|----------------------------|
| 140-150 cm     | 2       | 1161 ± 180 ( $\sigma=254$ ) | 748 ± 62 ( $\sigma=87.2$ ) | 613 ± 41 ( $\sigma=58.5$ )  | 398 ± 54 ( $\sigma=75.7$ ) |
| 150-160 cm     | 75      | 1157 ± 21 ( $\sigma=184$ )  | 800 ± 27 ( $\sigma=232$ )  | 668 ± 14 ( $\sigma=122$ )   | 311 ± 35 ( $\sigma=307$ )  |
| 160-170 cm     | 188     | 1175 ± 13 ( $\sigma=176$ )  | 781 ± 17 ( $\sigma=231$ )  | 658 ± 12 ( $\sigma=165$ )   | 300 ± 19 ( $\sigma=265$ )  |
| 170-180 cm     | 95      | 1209 ± 16 ( $\sigma=152$ )  | 808 ± 18 ( $\sigma=173$ )  | 688 ± 16 ( $\sigma=156$ )   | 309 ± 22 ( $\sigma=219$ )  |
| > 180 cm       | 3       | 1262 ± 130 ( $\sigma=223$ ) | 974 ± 170 ( $\sigma=300$ ) | 625 ± 9.5 ( $\sigma=16.4$ ) | 556 ± 220 ( $\sigma=373$ ) |
| $F_{4,358}$    |         | 1.19                        | 0.818                      | 0.684                       | 0.756                      |
| $p$            |         | 0.315                       | 0.514                      | 0.603                       | 0.554                      |
| $R^2$          |         | 0.0131                      | 0.00906                    | 0.00759                     | 0.00838                    |
| $\delta$       |         | 0.567                       | 0.906                      | 0.482                       | 0.962                      |

Table 75: Observable dependence on minimum height for dyads with average age in the 50-59 year range. Lengths in millimetres, times in seconds.

| Minimum height | $N_g^k$ | $V$                         | $r$                       | $x$                       | $y$                       |
|----------------|---------|-----------------------------|---------------------------|---------------------------|---------------------------|
| 140-150 cm     | 3       | 1043 ± 41 ( $\sigma=70.2$ ) | 784 ± 56 ( $\sigma=97$ )  | 746 ± 63 ( $\sigma=109$ ) | 190 ± 16 ( $\sigma=28$ )  |
| 150-160 cm     | 19      | 1067 ± 39 ( $\sigma=171$ )  | 757 ± 34 ( $\sigma=146$ ) | 611 ± 36 ( $\sigma=156$ ) | 334 ± 52 ( $\sigma=228$ ) |
| 160-170 cm     | 59      | 1162 ± 25 ( $\sigma=191$ )  | 830 ± 29 ( $\sigma=226$ ) | 664 ± 22 ( $\sigma=165$ ) | 371 ± 41 ( $\sigma=315$ ) |
| 170-180 cm     | 30      | 1241 ± 33 ( $\sigma=182$ )  | 862 ± 44 ( $\sigma=238$ ) | 635 ± 27 ( $\sigma=148$ ) | 436 ± 68 ( $\sigma=371$ ) |
| $F_{3,107}$    |         | 3.84                        | 0.928                     | 0.974                     | 0.806                     |
| $p$            |         | 0.0118                      | 0.43                      | 0.408                     | 0.493                     |
| $R^2$          |         | 0.0972                      | 0.0254                    | 0.0266                    | 0.0221                    |
| $\delta$       |         | 1.12                        | 0.502                     | 0.886                     | 0.687                     |

Table 76: Minimum height  $p$  values in different minimum age ranges.

| Minimum age     | $V$               | $r$    | $x$     | $y$    |
|-----------------|-------------------|--------|---------|--------|
| 0-9 years       | 0.000332          | 0.143  | 0.662   | 0.127  |
| 10-19 years     | 0.311             | 0.822  | 0.478   | 0.926  |
| 20-29 years     | 0.315             | 0.514  | 0.603   | 0.554  |
| 30-39 years     | $5 \cdot 10^{-7}$ | 0.595  | 0.00388 | 0.0423 |
| 40-49 years     | 0.000142          | 0.489  | 0.00545 | 0.0649 |
| 50-59 years     | 0.0118            | 0.43   | 0.408   | 0.493  |
| 60-69 years     | 0.091             | 0.23   | 0.24    | 0.182  |
| $\geq 70$ years | 0.627             | 0.0424 | 0.0506  | 0.107  |

Table 77: Minimum height  $\delta$  values in different minimum age ranges.

| Minimum age     | $V$   | $r$   | $x$   | $y$   |
|-----------------|-------|-------|-------|-------|
| 0-9 years       | 3.42  | 1.11  | 2     | 1.04  |
| 10-19 years     | 0.883 | 0.346 | 0.519 | 0.275 |
| 20-29 years     | 0.567 | 0.906 | 0.482 | 0.962 |
| 30-39 years     | 2.32  | 0.943 | 0.702 | 1.28  |
| 40-49 years     | 2.48  | 0.671 | 0.993 | 0.944 |
| 50-59 years     | 1.12  | 0.502 | 0.886 | 0.687 |
| 60-69 years     | 0.89  | 0.436 | 0.645 | 0.597 |
| $\geq 70$ years | 1.08  | 2.05  | 2.01  | 1.7   |
