# Supplementary material for: Intrinsic group behaviour: Dependence of pedestrian dyad dynamics on principal social and personal features
Source: PubMed Central journal article supplement (PMC5667819; doi:10.1371/journal.pone.0187253), 2017-11-02
Supplement: pone.0187253.s014.pdf [file pone.0187253.s014.pdf]

## Dependence on average and maximum age

### Average age

Table 1 shows the average age dependence of all observables, and the age dependence of variables  $r$ ,  $x$ ,  $y$  is also graphically shown in figure 1, while that of  $V$  is shown in figure 2 (left panels).

Table 1: Observable dependence on average age for dyads. Lengths in millimetres, times in seconds.

| Average age  | $N_g^k$ | $V$                         | $r$                       | $x$                        | $y$                        |
|--------------|---------|-----------------------------|---------------------------|----------------------------|----------------------------|
| 10-19 years  | 60      | 1147 ± 34 ( $\sigma=264$ )  | 865 ± 43 ( $\sigma=332$ ) | 575 ± 20 ( $\sigma=158$ )  | 496 ± 57 ( $\sigma=445$ )  |
| 20-29 years  | 370     | 1181 ± 9.2 ( $\sigma=178$ ) | 793 ± 12 ( $\sigma=226$ ) | 662 ± 8.1 ( $\sigma=155$ ) | 313 ± 14 ( $\sigma=274$ )  |
| 30-39 years  | 269     | 1213 ± 12 ( $\sigma=199$ )  | 831 ± 14 ( $\sigma=234$ ) | 670 ± 11 ( $\sigma=174$ )  | 360 ± 18 ( $\sigma=302$ )  |
| 40-49 years  | 195     | 1172 ± 13 ( $\sigma=183$ )  | 852 ± 17 ( $\sigma=232$ ) | 674 ± 12 ( $\sigma=167$ )  | 387 ± 23 ( $\sigma=316$ )  |
| 50-59 years  | 114     | 1157 ± 18 ( $\sigma=194$ )  | 825 ± 20 ( $\sigma=217$ ) | 650 ± 15 ( $\sigma=159$ )  | 376 ± 30 ( $\sigma=317$ )  |
| 60-69 years  | 69      | 1032 ± 20 ( $\sigma=168$ )  | 875 ± 40 ( $\sigma=332$ ) | 635 ± 20 ( $\sigma=163$ )  | 467 ± 50 ( $\sigma=416$ )  |
| ≥ 70 years   | 12      | 886 ± 29 ( $\sigma=99.8$ )  | 786 ± 79 ( $\sigma=275$ ) | 588 ± 19 ( $\sigma=66.6$ ) | 385 ± 100 ( $\sigma=363$ ) |
| $F_{6,1082}$ |         | 13.2                        | 2.26                      | 3.79                       | 4.75                       |
| $p$          |         | < $10^{-8}$                 | 0.036                     | 0.000955                   | $8.72 \cdot 10^{-5}$       |
| $R^2$        |         | 0.0681                      | 0.0124                    | 0.0206                     | 0.0257                     |
| $\delta$     |         | 1.67                        | 0.275                     | 0.598                      | 0.603                      |

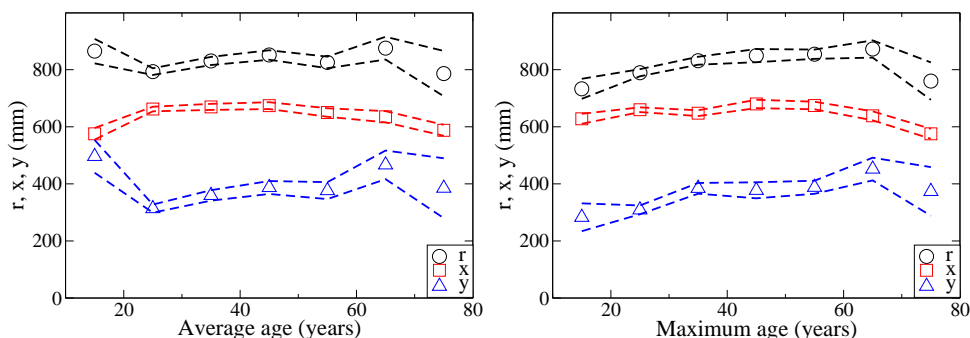

Figure 1:  $r$  (black and circles),  $x$  (red and squares) and  $y$  (blue and triangles) dependence on average (left) and maximum (right) age. Dashed lines provide standard error confidence bars. The point at 75 years corresponds to the “70 years or more” slot.

### Maximum age

Table 2 shows the average age dependence of all observables, and the age dependence of variables  $r$ ,  $x$ ,  $y$  is also graphically shown in figure 1, while that of  $V$  is shown in figure

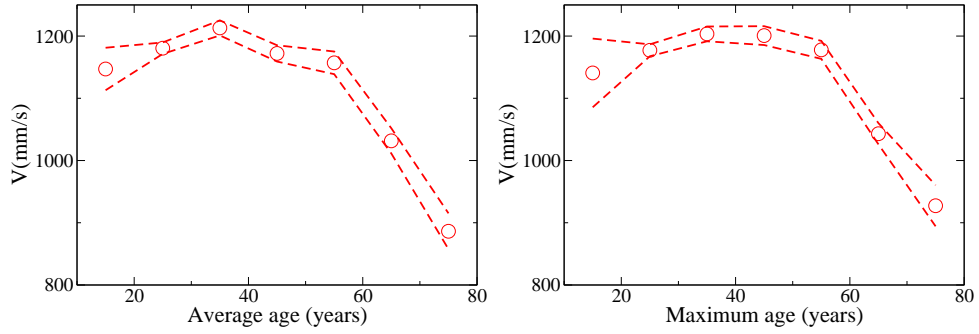

Figure 2:  $V$  dependence on average (left) and maximum (right) age. Dashed lines provide standard error confidence bars. The point at 75 years corresponds to the “70 years or more” slot.

2 (right panels).

Table 2: Observable dependence on maximum age for dyads. Lengths in millimetres, times in seconds.

| Maximum age     | $N_g^k$ | $V$                             | $r$                           | $x$                            | $y$                           |
|-----------------|---------|---------------------------------|-------------------------------|--------------------------------|-------------------------------|
| 10-19 years     | 28      | $1141 \pm 55$ ( $\sigma=292$ )  | $733 \pm 35$ ( $\sigma=186$ ) | $628 \pm 17$ ( $\sigma=92.5$ ) | $283 \pm 49$ ( $\sigma=258$ ) |
| 20-29 years     | 327     | $1177 \pm 9.6$ ( $\sigma=174$ ) | $789 \pm 12$ ( $\sigma=225$ ) | $660 \pm 8.2$ ( $\sigma=149$ ) | $309 \pm 15$ ( $\sigma=278$ ) |
| 30-39 years     | 292     | $1203 \pm 12$ ( $\sigma=204$ )  | $831 \pm 14$ ( $\sigma=238$ ) | $648 \pm 10$ ( $\sigma=172$ )  | $384 \pm 19$ ( $\sigma=321$ ) |
| 40-49 years     | 143     | $1201 \pm 15$ ( $\sigma=181$ )  | $849 \pm 23$ ( $\sigma=275$ ) | $680 \pm 15$ ( $\sigma=176$ )  | $377 \pm 28$ ( $\sigma=336$ ) |
| 50-59 years     | 179     | $1178 \pm 14$ ( $\sigma=193$ )  | $854 \pm 16$ ( $\sigma=217$ ) | $674 \pm 13$ ( $\sigma=178$ )  | $388 \pm 23$ ( $\sigma=306$ ) |
| 60-69 years     | 105     | $1043 \pm 17$ ( $\sigma=174$ )  | $872 \pm 30$ ( $\sigma=310$ ) | $638 \pm 16$ ( $\sigma=162$ )  | $452 \pm 40$ ( $\sigma=407$ ) |
| $\geq 70$ years | 15      | $927 \pm 33$ ( $\sigma=128$ )   | $760 \pm 65$ ( $\sigma=254$ ) | $575 \pm 18$ ( $\sigma=67.9$ ) | $374 \pm 85$ ( $\sigma=330$ ) |
| $F_{6,1082}$    |         | 14.2                            | 3.37                          | 1.97                           | 3.7                           |
| $p$             |         | $< 10^{-8}$                     | 0.0027                        | 0.0668                         | 0.00122                       |
| $R^2$           |         | 0.0731                          | 0.0183                        | 0.0108                         | 0.0201                        |
| $\delta$        |         | 1.38                            | 0.484                         | 0.619                          | 0.443                         |

## Discussion

It may be seen that the results concerning maximum and average and minimum (shown in the main text) age are quite similar above 20 years. Nevertheless, using minimum age allows us to spot the presence of children below 10 years of age and verify their peculiar behaviour.
